1 **Title: The genetic architecture of human cerebellar morphology supports a key role for the**  
2 **cerebellum in human evolution and psychopathology**

3  
4 **Short title: Genetic architecture of cerebellar morphology**

5  
6 **Authors:** Torgeir Moberget<sup>\*1,2</sup>, Dennis van der Meert<sup>†1,3</sup>, Shahram Bahrami<sup>†1</sup>, Daniel Roelfs<sup>1</sup>,  
7 Oleksandr Frei<sup>1</sup>, Tobias Kaufmann<sup>1,4</sup>, Sara Fernandez-Cabello<sup>1</sup>, Milin Kim<sup>1</sup>, Thomas Wolfers<sup>1,4</sup>,  
8 Joern Diedrichsen<sup>5</sup>, Olav B. Smeland<sup>1</sup>, Alexey Shadrin<sup>1</sup>, Anders Dale<sup>6</sup>, Ole A. Andreassen<sup>1</sup> & Lars  
9 T. Westlye<sup>1,7</sup>.

10  
11 \*Corresponding author

12 †These two authors contributed equally

13  
14 **Affiliations:**

15 1: Norwegian Centre for Mental Disorders Research (NORMENT), Division of Mental Health and  
16 Addiction, Oslo University Hospital & Institute of Clinical Medicine, University of Oslo, Oslo,  
17 Norway

18 2: Department of Behavioral Science, School of Health Sciences, Oslo Metropolitan University -  
19 OsloMet, Oslo, Norway.

20 3: School of Mental Health and Neuroscience, Faculty of Health, Medicine and Life Sciences,  
21 Maastricht University, The Netherlands

22 4: Department of Psychiatry and Psychotherapy, Tübingen Center for Mental Health, University of  
23 Tübingen, Germany

24 5: Brain and Mind Institute, University of Western Ontario, London, Canada

25 6: Center for Multimodal Imaging and Genetics, University of California at San Diego, La Jolla, CA,  
26 USA

27 7: Department of Psychology, Faculty of Social Sciences, University of Oslo, Norway

28

29

30

31

32

33

34

35

36

37

**NOTE: This preprint reports new research that has not been certified by peer review and should not be used to guide clinical practice.**

38 **Abstract:**

39 The functional domain of the cerebellum has expanded beyond motor control to also include  
40 cognitive and affective functions. In line with this notion, cerebellar volume has increased over recent  
41 primate evolution, and cerebellar alterations have been linked to heritable mental disorders. To map  
42 the genetic architecture of human cerebellar morphology, we here studied a large imaging genetics  
43 sample from the UK Biobank (n discovery = 27,302; n replication: 11,264) with state-of-the art  
44 neuroimaging and biostatistics tools. Multivariate GWAS on regional cerebellar MRI features yielded  
45 351 significant genetic loci (228 novel, 94% replicated). Lead SNPs showed positive enrichment for  
46 relatively recent genetic mutations over the last 20-40k years (i.e., overlapping the Upper Paleolithic,  
47 a period characterized by rapid cultural evolution), while gene level analyses revealed enrichment  
48 for human-specific evolution over the last ~6-8 million years. Finally, we observed genetic overlap  
49 with major mental disorders, supporting cerebellar involvement in psychopathology.

50

51 **Teaser:** Genome-wide analysis of cerebellar morphology reveals links to recent human evolution  
52 and psychopathology

53

54

55

56

57

58

59

60

61

62

63

64

65

66

67

68

69

70

71

72

73

## 74 **Introduction**

75 The cerebellum contains ~80% of all neurons in the human brain<sup>1</sup> and has rapidly expanded in  
76 volume over recent primate evolution<sup>2</sup>. Indeed, the surface area of the cerebellar cortex extends to  
77 almost 80% of the surface area of the cerebral cortex<sup>3</sup>. Comparative genetic analyses suggest that  
78 protein coding genes with known roles in cerebellar development have been subject to a similar, or  
79 even greater, rate of hominid evolution as compared to cerebro-cortical developmental genes<sup>4</sup>. Thus,  
80 the evolution of the cerebellum may have played a key role in the emergence of human cognition,  
81 including language<sup>5</sup>.

82 A growing number of neuroimaging and clinical studies in humans also link cerebellar  
83 structure and function to a wide range of cognitive and affective functions<sup>6-8</sup>, as well as to a number  
84 of heritable developmental<sup>9</sup> and psychiatric<sup>10</sup> disorders where these abilities either fail to develop  
85 properly or are compromised later in life. However, compared to supra-tentorial brain structures such  
86 as the cerebral cortex<sup>11</sup> and the hippocampus<sup>12</sup>, few studies have mapped the genetic architecture  
87 of the cerebellum.

88 Of note, the few existing cerebellar genome-wide association studies (GWAS) have mostly  
89 been restricted to total cerebellar volume<sup>13,14</sup>, thus largely ignoring regional variation in cerebellar  
90 morphology. Importantly, such variation in the relative volumes of cerebellar subregions (i.e.,  
91 variation in cerebellar shape independent of total cerebellar volume) has been associated with  
92 variation in behavioral repertoires in several species<sup>15,16</sup>, including domain-general cognition in  
93 primates<sup>16</sup>.

94 We here performed a multivariate GWAS of MRI-derived regional cerebellar morphological  
95 features in a large population-based sample from the UK biobank (n discovery = 27,302; n replication  
96 = 11,264), functionally characterized the genetic signal, tested for enrichment of SNPs and genes  
97 linked to human evolution, and assessed genetic overlap with major mental disorders.

98

## 99 **Results**

100

### 101 **Data-driven decomposition of cerebellar grey matter maps reveals highly reproducible** 102 **structural covariance patterns.**

103 Since traditional atlases of the cerebellar cortex based on gross anatomical landmarks (i.e., lobules)  
104 only partially overlap with more recent functional parcellations of the cerebellum<sup>17-25</sup>, we first used a  
105 data-driven approach (non-negative matrix factorization, NNMF<sup>26-28</sup>) to parcellate voxel-based  
106 morphometry (VBM) based maps of cerebellar grey matter volume (containing 147,121 1\*1\*1 mm  
107 voxels) from 28,212 participants into a smaller number of structural covariance patterns (SCPs), i.e.,  
108 cerebellar sub-regions where voxel-volumes co-vary consistently across individuals (see Online  
109 Methods for details about the study sample, MRI processing and quality control procedures). Like  
110 other dimensionality reduction methods, such as principal component analysis (PCA) or independent  
111 component analysis (ICA), NNMF decomposes the input matrix (here 147k voxels \* 28k participants)

112 into two lower rank matrices (voxel weights:  $W$ , and participant weights:  $H$ ), so that the product of  $W$   
113 and  $H$  approximates the original input data. The defining feature of NNMF is that it requires these  
114 lower rank matrices to be non-negative, which has previously been shown to result in sparse,  
115 reproducible and easily interpretable parcellations of high-dimensional brain imaging data<sup>26-30</sup>. In  
116 essence, when applied to voxel-wise indices of grey matter volume, NNMF yields distinct maps of  
117 voxels that show similar patterns of volume-variation across individuals, commonly referred to as  
118 “structural covariance patterns”<sup>26,27,29</sup>. For each structural covariance pattern (common across all  
119 participants), NNMF also provides individual subject weights expressing the degree to which these  
120 patterns are expressed, i.e., reflecting individual variation in regional cerebellar volumes.

121 In the current study NNMF yielded highly reproducible cerebellar structural covariance  
122 patterns (across split-half datasets) for model orders (i.e., number of components/patterns specified)  
123 ranging from 2 to 100 (see Supplementary Figures 2 for summary maps of all tested model orders).  
124 After observing that the improved fit to the original data seen with higher model orders tended to  
125 level off between 15 and 30 components (indicating that the intrinsic dimensionality of the data might  
126 have been reached (see Supplementary Figure 3), we decided on a model order of 23 based on its  
127 good split-half reproducibility (see Fig. 1B, and Online Online Methods for details regarding model  
128 order selection). Importantly, when subject weights were summed across the 23 structural  
129 covariance maps, the resulting values correlated tightly ( $r = 0.9995$ ) with estimates of total cerebellar  
130 grey matter volume (see also Supplementary Figure 4), demonstrating that our data-driven  
131 decomposition preserved inter-individual variation in cerebellar volume.

132

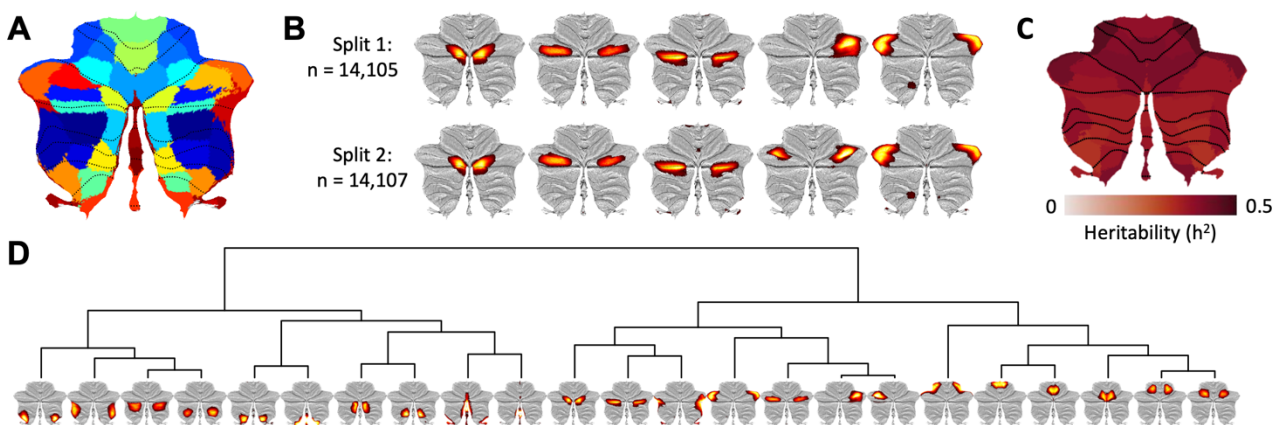

133

134 **Figure 1: Data driven decomposition of cerebellar grey matter maps yields highly reproducible and**  
135 **moderately heritable structural covariance patterns (SCPs).** **A:** Binarized winner-takes-all map for the 23-  
136 component solution based on data-driven decomposition of cerebellar grey matter maps from 28,212  
137 participants. Note that empirically derived boundaries between cerebellar regions only partially follow  
138 traditional lobular borders (marked with dotted black lines); **B:** Five distinct components overlapping cerebellar  
139 Crus I derived from the split-half reliability analyses. While one of these SCPs emerged as bilateral in Split 2,  
140 the remaining four SCPs were almost identical, despite being derived from two independent samples; **C:**  
141 Narrow sense (SNP-based) heritability of the 23 SCPs (see Supplementary Data 5 for numerical values). **D:**  
142 Hierarchical clustering of the 23 SCPs (derived from the full sample decomposition) based on their pairwise

143 *genetic correlations revealed a primary division between the anterior and posterior cerebellum, with additional*  
144 *separations between medial and lateral regions. The full genetic correlation matrix can be found in*  
145 *Supplementary Data 6.*

146

147 Of note, our data-driven decomposition differed markedly from the standard cerebellar atlas based  
148 on gross anatomical features, shown as dotted lines in Fig 1A (see Supplementary Figure 3 for all  
149 23 components and Supplementary Data 1 for quantification of overlap between NNMF-derived  
150 structural covariance patterns (SCPs) and standard cerebellar anatomical regions, i.e. lobules). For  
151 instance, five distinct SCPs overlapped Crus I of cerebellar lobule VII (shown in Fig 1B), an  
152 anatomical region which already started to split into separate components at a model order of three.  
153 We further observed only partial overlap with task-based functional parcellations of the cerebellar  
154 cortex (Supplementary Data 2). While some SCPs clearly overlapped cerebellar regions previously  
155 associated with hand movements, eye-movements/saccades or autobiographical recall, other data-  
156 driven SCPs overlapped multiple functionally defined cerebellar regions (Supplementary Data 2).

157

158 **Cerebellar structural covariance patterns are heritable and reveals a distinct anterior-**  
159 **posterior pattern based on their bivariate genetic correlations.**

160 After removal of one of each genetically related pair of individuals ( $n = 910$ ), 27,302 participants  
161 remained for the genetic analyses. In addition to the 23 regional cerebellar structural covariance  
162 patterns of primary interest, we also included total cerebellar volume, estimated total intracranial  
163 volume and 9 cerebral brain phenotypes to serve as covariates and/or comparison phenotypes. Prior  
164 to all genetic analyses, morphological features were adjusted for effects of scanner site, sex, age,  
165 estimated total intracranial volume, 40 genetic population components, genetic analysis batch and  
166 a quantitative structural MRI quality index (the Euler number<sup>31</sup>) using general additive models, before  
167 finally being rank-order normalized (see Online Methods for details).

168 To validate our analysis approach, we computed genetic correlations (using LD-score  
169 regression, LDSC<sup>32</sup>) between univariate GWAS results on the comparison features (see Manhattan-  
170 and QQ-plots in Supplementary Figure 5) and previously published neuroimaging GWAS studies on  
171 these brain phenotypes. Results showed a mean  $r_g$  of .90 (range: .80-.99, see Supplementary Data  
172 3). For the 23 cerebellar morphological features, we used the univariate GWAS summary statistics  
173 (see Supplementary Figures 6-7 for Manhattan- and QQ-plots) to compute genetic correlations  
174 between discovery ( $n = 27,302$ ) and replication ( $n = 11,264$ ) samples using LDSC<sup>32</sup>. These genetic  
175 correlations were high (mean  $r_G$ : .92; range: .83-1), indicating reliable genetic signals (see  
176 Supplementary Data 4).

177 Genetic complex trait analysis (GCTA<sup>33</sup>) revealed SNP-based heritability estimates ( $h^2$ )  
178 ranging from .33 to .44 (Figure 1C and Supplementary Data 5). Analyses of total cerebellar volume  
179 ( $h^2 = .35$ ), estimated total intracranial volume ( $h^2 = .41$ ) and the 9 cerebral comparison phenotypes  
180 ( $h^2$  range: .26 to .45) gave a similar range of heritability estimates (Supplementary Data 5).

181 Hierarchical clustering of cerebellar features based on their bivariate genetic correlation  
182 matrix (GCTA-based rG ranging from 0.35 to 0.98, Supplementary Data 8) revealed a primary  
183 anterior-posterior division running along the horizontal fissure separating Crus I and Crus II, with  
184 secondary divisions grouping features into more lateral or medial, as well as more anterior and  
185 posterior features within the major anterior and posterior regions (Fig 1D). Of note, the primary  
186 division along the horizontal fissure was also evident from the (genetically naïve) two-component  
187 NNMF decomposition, while medial-to-lateral divisions already began to emerge with a model order  
188 of three (see Supplementary Figure 1).

189 In order to examine whether this phenotypic and genetic correlation structure was also  
190 reflected in regional cerebellar gene expression patterns, we used the abagen toolbox<sup>34</sup> to extract  
191 Allen Human Brain Atlas<sup>35</sup> gene expression profiles for 22 of the 23 morphological features and  
192 computed their bivariate Pearson correlations (across 15,631 genes; Supplementary Data 7) and  
193 hierarchical clustering solution (Supplementary Figure 8). The anterior-posterior boundary across  
194 the horizontal fissure was also evident in the gene expression data, which in addition highlighted  
195 distinct gene expression patterns for the posterior midline (grouped together with the horizontal  
196 fissure), as well as for the most lateral regions of the cerebellar cortex.

197

#### 198 **Multivariate GWAS reveals 351 genetic loci associated with cerebellar morphology.**

199 Figure 2A shows the main results for the multivariate GWAS across the 23 cerebellar structural  
200 covariance patterns applying MOSTest<sup>36</sup>. We observed 35,098 genome-wide significant (GWS)  
201 SNPs, which were mapped by FUMA<sup>37</sup> to a total of 51,803 candidate SNPs by adding reference  
202 panel SNPs in high LD ( $r > .6$ ) with GWS SNPs. The 51,803 candidate SNPs (see Supplementary  
203 Data 8) were represented by 1,936 independent significant SNPs and 560 lead SNPs in 351 genomic  
204 loci (see Supplementary Data 10). The LDSC intercept of the MOSTest summary statistics was  
205 1.0352 (i.e., indicative of no or minimal genetic inflation), while the QQ-plot of results based on  
206 permuted data (under the null hypothesis) confirmed the validity of the MOSTest analytical approach  
207 (Supplementary Figure 9).

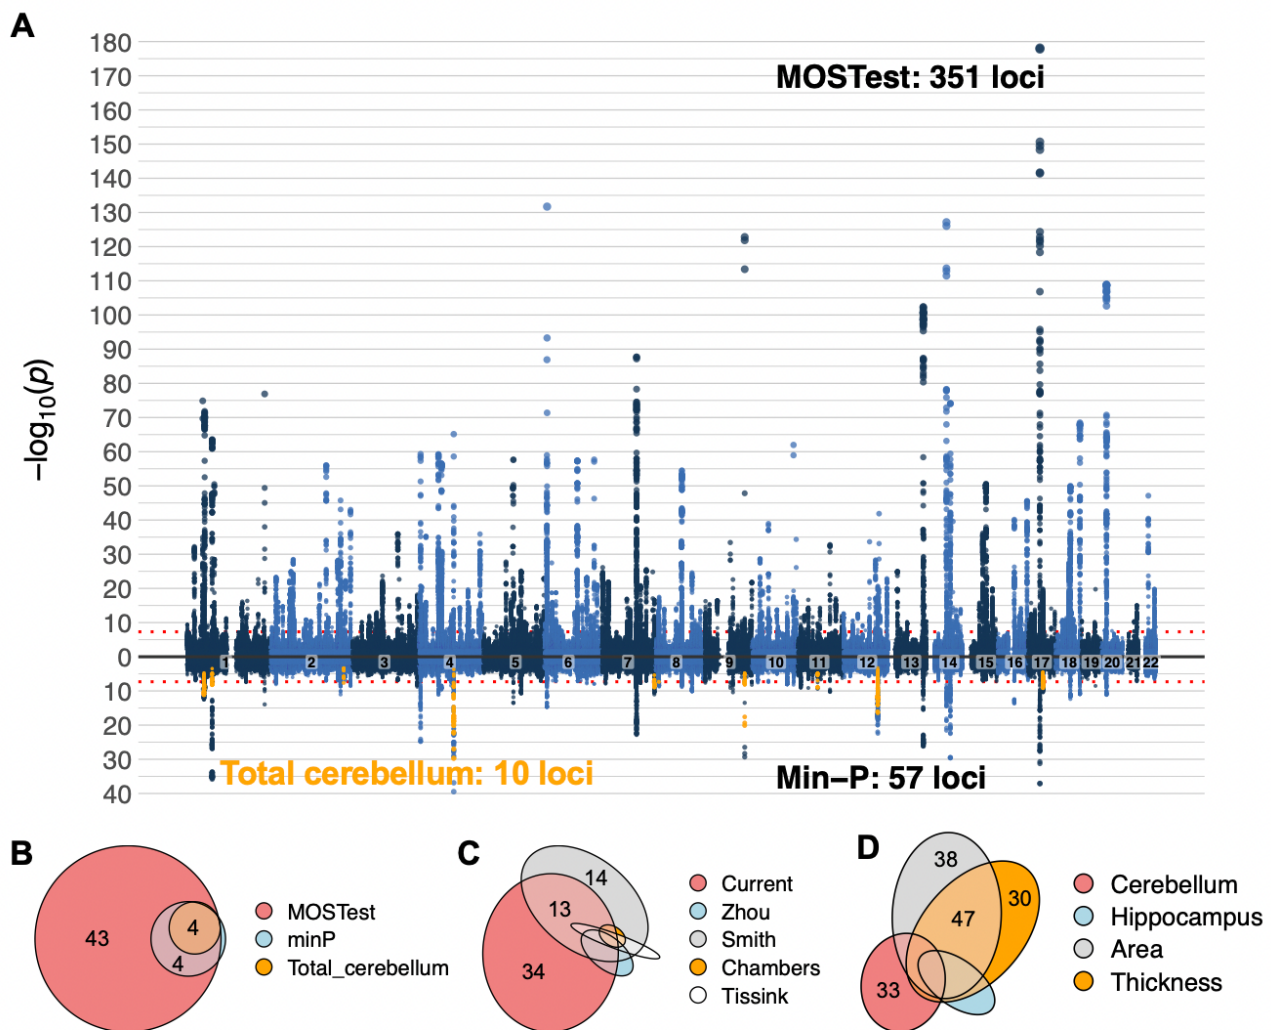

208

209

210

211

212

213

214

215

216

217

218

219

220

221

222

223

224

225

**Figure 2: Multivariate GWAS analysis of the 23 cerebellar structural covariance patterns revealed 351 independent genome-wide significant (GWS) loci.** **A:** The upper half of the Miami plot shows the main results from the multivariate analysis. The lower half displays results from a series of 23 univariate analyses (corrected for multiple comparisons using the standard min-P approach), as well as results from a univariate analysis of total cerebellar grey matter (marked in orange). **B-D:** Euler diagrams showing the relative numbers of - and overlaps between - candidate SNPs (in thousands) mapped by the three analysis approaches employed in the current study (**B**), the current and four recent studies reporting genetic associations with cerebellar morphology (**C**), as well as results from multivariate GWASs on hippocampal and cerebrocortical morphology (**D**). For full results on overlap between all cerebellar candidate SNPs and other brain phenotypes, see Supplementary Data 8.

Annotation of all candidate SNPs using ANNOVAR<sup>38</sup> as implemented in FUMA<sup>35</sup> revealed that the majority of candidate SNPs were intronic (57.8%) or intergenic (38.3%). While only 0.7% were exonic, about 81% of the candidate SNPs were assigned minimal chromatin states between 1 and 7 (i.e., open chromatin states), implying effects on active transcription<sup>37</sup> (see Supplementary Data 8-9).

226 We evaluated the robustness of these multivariate results using a multivariate replication  
227 procedure established in Loughnan et al<sup>39</sup>, which computes a composite score from the mass-  
228 univariate z-statistics (i.e., applying multivariate weights from the discovery sample to the replication  
229 sample input data) and then tests for associations between this composite score and genotypes in  
230 the replication sample (for mathematical formulation see Loughnan et al<sup>39</sup>). Results showed that  
231 97% of the 339 loci lead SNPs present in both samples (i.e., 94% of the 351 reported loci lead SNPs  
232 from the discovery sample) replicated at a nominal significance threshold of  $p < .05$  (Supplementary  
233 Figure 10 and Supplementary Data 10), and that 74% remained significant after Bonferroni  
234 correction (Supplementary Data 10). Moreover, 99% of loci lead SNPs showed the same effect  
235 direction across discovery and replication samples (Supplementary Figure 9 and Supplementary  
236 Data 10).

237 In addition, we assessed the robustness of the multivariate patterns by computing bivariate  
238 correlations between feature z-score vectors assigned to the discovery sample lead SNPs in an  
239 independent multivariate GWAS (MOSTest) performed on the replication sample. These correlations  
240 (restricted to the 339 loci lead SNPs present in both samples) were relatively high (mean  $r$ : .70, see  
241 Supplementary Data 10 and Supplementary Figure 11). Figure 3 and Supplementary Figure 11 also  
242 give some examples of discovery and replication sample multivariate patterns projected back onto  
243 the cerebellar cortex.

244 To compare our main multivariate MOSTest results to univariate approaches, the lower part  
245 of the Miami plot in Figure 2A, and Figure 2B, displays results from a set of univariate GWASs on  
246 the cerebellar morphological features (which yielded 8370 candidate SNPs and 57 genomic loci,  
247 corrected for multiple comparisons using the min-P approach<sup>40,41</sup>, see also Supplementary Figures  
248 6-7 for univariate Manhattan and QQ-plots), as well as the 4044 candidate SNPs and 10 significant  
249 loci resulting from the univariate GWAS on total cerebellar grey matter volume (marked in orange).  
250 52 of the 57 loci identified in the univariate analyses of regional cerebellar features overlapped 55 of  
251 the 351 loci identified using the multivariate method, while 9 out of 10 loci identified in the univariate  
252 analysis of total cerebellar volume were also identified in the multivariate analysis (the slightly  
253 mismatching numbers are due to loci of unequal lengths, causing some larger loci to overlap with  
254 several smaller loci). Thus, our multivariate analysis of regional cerebellar features increased the  
255 locus yield ~35-fold relative to analyzing total cerebellar volume and ~6-fold relative to performing a  
256 set of univariate analyses on the same regional features.

257 We next compared the current findings with previously reported genetic loci for cerebellar  
258 morphology by extracting summary statistics from two recent GWAS studies using the UKBB sample  
259 ( $n = 19k^{42}$  and  $33k^{43}$ ) that included regional cerebellar volumes among the full set of analyzed brain  
260 imaging-derived phenotypes ( $101^{42}$  and  $3,144^{43}$ , respectively), as well as two recent GWASs on total  
261 cerebellar volume ( $n = 33k^{13}$  and  $27k^{14}$ , respectively). Candidate SNPs and independent GWS loci  
262 were identified in FUMA using the same settings as for our primary analyses and employing a liberal  
263  $p$ -value threshold of  $5e-8$  (i.e., not correcting for the total number of brain imaging features analyzed).



264 Results are displayed in Figure 2c and Supplementary Data 8 and 10. In brief, we found that 19,527  
265 of the 51,803 candidate SNP (i.e., 36%) and 123 of the 351 identified genomic loci (i.e., 35%)  
266 overlapped with candidate SNPs and loci extracted from these three previous studies. Thus, 228 of  
267 the 351 (i.e., 65%) genetic loci reported here are novel to the literature on of cerebellar morphology  
268 genetics (see Supplementary Data 10).

269 Overlap of cerebellar candidate SNPs and genetic loci with results from recent multivariate  
270 analyses of hippocampal and cerebrocortical morphology are displayed in Figure 2D and  
271 Supplementary Data 8 and 10 (final columns). Of note, we found that 32 and 29 percent of the  
272 candidate SNPs discovered here for the cerebellum overlapped with candidate SNPs for vertex-wise  
273 cerebrocortical surface area and thickness<sup>44</sup>, respectively, while 11.4 percent overlapped with  
274 candidate SNPs found for hippocampal subregions<sup>45</sup>. 95 of the 351 genetic loci overlapped loci  
275 linked to the other multivariate brain phenotypes (Supplementary Data 10). Thus, 64% of the  
276 candidate SNPs and 73% of genetic loci appeared to be specifically associated with cerebellar  
277 morphology.

278

279 **Significant genetic variants show heterogeneous effects across the cerebellar cortex,**  
280 **influencing both regional and total volumes.**

281 A major advantage of our multivariate analysis approach is its sensitivity to both highly localized and  
282 more generally distributed effects of SNPs on cerebellar morphology. This is illustrated in Figure 3,  
283 which displays the 351 loci lead SNPs as a function of both the most extreme individual Z-score  
284 across all cerebellar features (e.g, analogous to the strongest “local” effect) and of the mean Z-score  
285 across these features (i.e. analogous to the main effect on overall cerebellar volume).

286

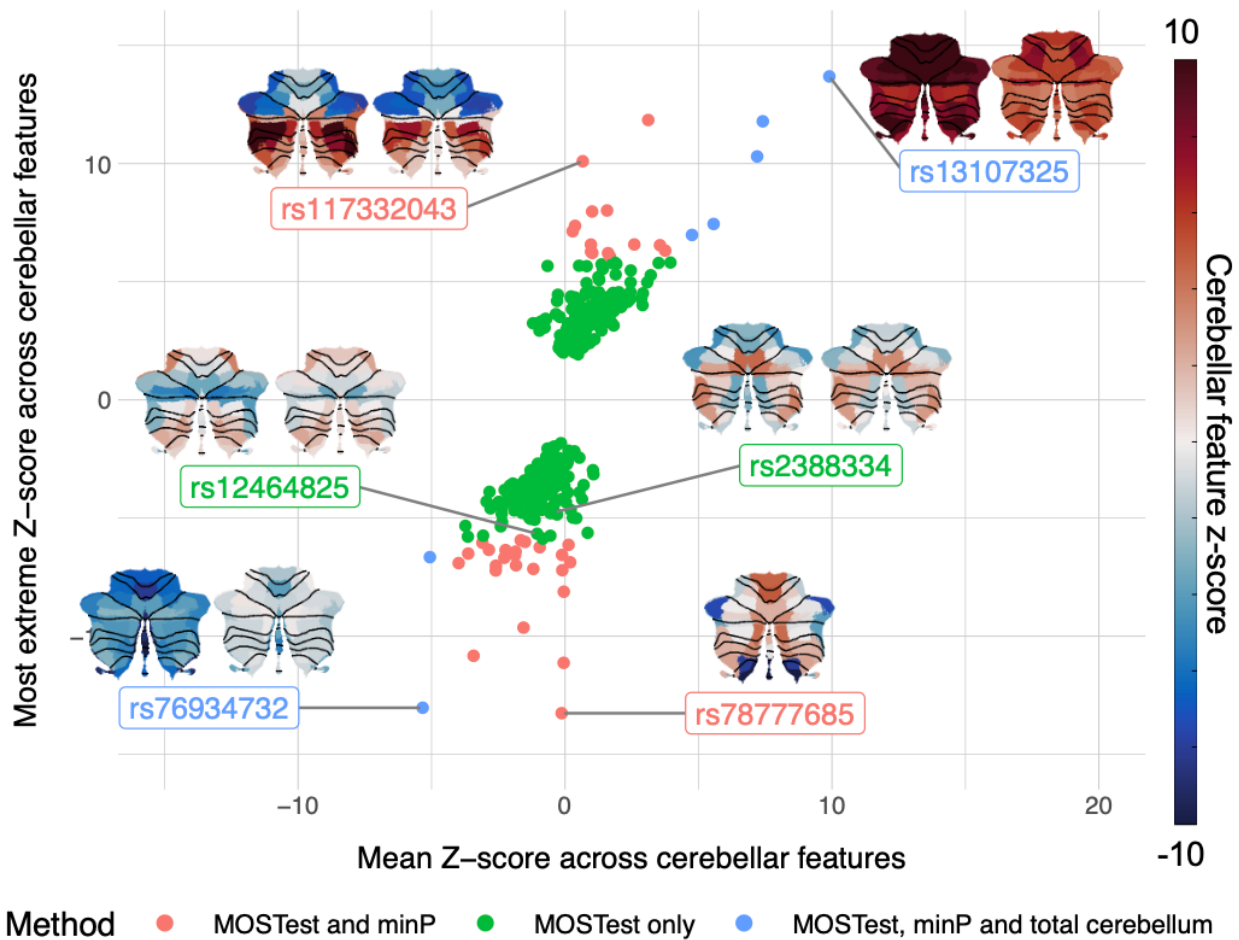

287

288 **Figure 3: Loci lead SNPs show spatially heterogeneous and replicable effects across the cerebellar**  
289 **cortex.** The 351 loci lead SNPs identified by MOSTest are plotted as a function of main overall effect across  
290 all cerebellar features (x-axis: mean Z-score) and most extreme effect for any single cerebellar feature (y-axis:  
291 most extreme Z-score across features), and colour coded by SNP discovery method. The cerebellar flat-maps  
292 show discovery (left) and replication (right) sample regional distributions of Z-scores (color-scale range from -  
293 10 to 10) for a few selected lead SNPs (see Supplementary Data 10 for individual feature Z-scores for all 351  
294 discovery sample loci lead SNPs). SNP rs78777685 was only present in the discovery sample.

295

296 As can be seen, some loci lead SNPs (e.g. rs13107325; rs76934732) show pronounced positive or  
297 negative mean z-scores, indicating a relatively consistent direction of effect across cerebellar  
298 features. See also inset figures displaying feature Z-scores projected back onto the cerebellar cortex.  
299 Many of these SNPs also emerged in the univariate analysis of total cerebellar volume and were  
300 recently reported in GWASs on total cerebellar volume<sup>13,14</sup>.

301

302 Many other loci lead SNPs, however, show strong “local” signals with opposite effect  
303 directions across features, yielding very weak global signals (e.g. rs117332043; rs78777685). Thus,  
304 while several of the most significant SNPs in this category have previously been reported in GWASs  
305 including local cerebellar morphological features<sup>42,43</sup>, they did not emerge from analyses of total  
cerebellar volume, neither in the current nor in previous studies.

306 Finally, our multivariate MOSTest approach is also sensitive to SNPs displaying weaker  
307 effects distributed across several cerebellar features, often with opposite effect directions (e.g.  
308 rs12464825; rs2388334). For this category of SNPs, neither of the univariate methods have sufficient  
309 power at the current sample size. In contrast, these two example SNPs robustly emerged from the  
310 multivariate analysis (discovery sample p-values < 1e-56; replication sample p-values < 1e-15).

311

### 312 **Genetic variants associated with cerebellar morphology are enriched for evolutionary recent** 313 **mutations in the human genome.**

314 We next mapped the evolutionary age of cerebellar lead SNPs (thresholded for linkage  
315 disequilibrium at  $r^2 < 0.1$ ) by merging them with a recently published dataset on dated mutations in  
316 the human genome<sup>46</sup>. Following the analysis procedure established by Libedinsky et al.<sup>47</sup>, we plotted  
317 the histogram of dated lead SNPs over the last 2 million years in bins of 20,000 years (Figure 4A  
318 and Supplementary Data 11), and tested for positive or negative enrichment by comparing them to  
319 empirical null distributions derived from 10,000 randomly drawn and equally sized sets of all SNPs  
320 in the full human genome dating dataset (after matching them to cerebellum-associated lead SNPs  
321 in terms of minor allele frequency; see Online Methods for details).

322

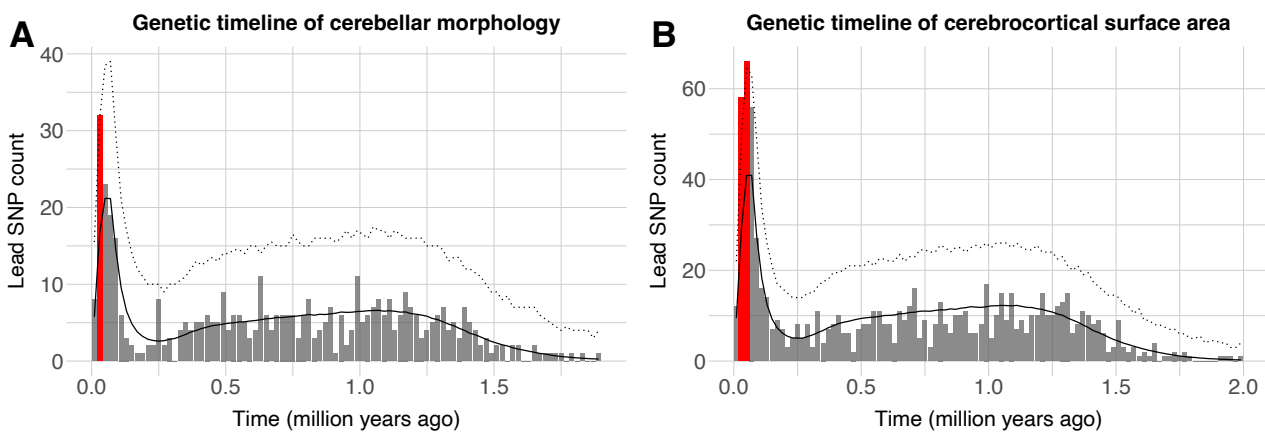

323

324 **Figure 4: Lead SNPs associated with cerebellar morphology are enriched for evolutionary recent**  
325 **mutations in the human genome. A:** Histogram of estimated SNP age (ranging from 0 to 2 million years, in  
326 bins on 20,000 years) for 548 independent lead SNPs associated with cerebellar morphology. The solid black  
327 and dotted lines denote the mean and upper 95th confidence interval (Bonferroni corrected across 100 time-  
328 bins) derived from a null model constructed from 10,000 of equally sized sets of SNPs randomly drawn from  
329 the Human Genome Dating Atlas of Variant Age (after matching these to cerebellar lead SNPs in terms of  
330 minor allele frequencies). Red bars denote time-bins of significant positive enrichment. **B:** Histogram showing  
331 comparative evolutionary enrichment effects for lead SNPs identified in a multivariate GWASs of  
332 cerebrocortical area (for cerebrocortical thickness, see Supplementary Figure 12), See Supplementary Data  
333 11-12 for full numerical results.

334

335 Results revealed positive enrichment for cerebellar lead SNPs in the time bin ranging from 20-40,000  
336 years ago, i.e., overlapping the Upper Paleolithic, a period characterized by rapid cultural evolution

337 and the first evidence of several uniquely human behaviors (often referred to as behavioral  
338 modernity), such as the recording of information onto objects<sup>48</sup>.

339 For comparison, Figure 4B also shows results from an analysis of lead SNPs identified in a  
340 previous multivariate GWAS study of regional cerebrocortical surface area<sup>44</sup>, while Supplementary  
341 Figure 12 shows the corresponding histogram for regional cerebrocortical thickness. As can be seen,  
342 both these cerebrocortical phenotypes also showed significant enrichment in overlapping time bins  
343 (i.e., 20-60,000 years ago). For full numerical results in Supplementary Data 12. Given the relatively  
344 low number of independent lead SNPs (range: 548-862 SNPs across phenotypes) , we also ran  
345 validation analyses using all independent significant SNPs (LD-thresholded at  $r^2 < 0.6$ , range: 1574-  
346 2883 SNPs), which yielded very similar results (see Supplementary Figure 13 and Supplementary  
347 Table 13).

348

349 **Genes associated with cerebellar morphology show selective expression in cerebellar and**  
350 **prenatal brain tissue, as well as enrichment for genes linked to human accelerated regions.**

351 To functionally characterize the multivariate GWAS signal, we mapped the full set of GWAS p-values  
352 to 19,329 protein coding genes using MAGMA<sup>49</sup> and used the resulting gene-level p-values to test  
353 for 1) GWS genes, 2) gene expression in brain tissue; and 3) enrichment for genes linked to human  
354 accelerated regions (HARs), i.e. sections of DNA that have remained relatively conserved  
355 throughout mammalian evolution, before being subject to a burst of changes in humans since  
356 divergence of humans from chimpanzees<sup>50,51</sup>. These analyses yielded a total of 534 GWS genes  
357 (i.e., 2.78% of all protein coding genes, see Figure 5A and Supplementary Data 14). Using the full  
358 set of 19,329 gene-level p-values in MAGMA gene property analyses revealed significant and  
359 specific gene expression in cerebellar and prenatal brain tissue (Figure 5B-C and Supplementary  
360 Data 15-16), with the selective cerebellar expression seen in two independent datasets (Allen  
361 Human Brain Atlas<sup>35</sup> and The Genotype-Tissue Expression (GTEx) Project).

362 The MAGMA gene set analysis of HAR-linked genes revealed significant enrichment ( $p =$   
363  $7.09e-08$ ) for genes associated with cerebellar morphology (Figure 5D, Supplementary Data 17). Of  
364 note, running this same HAR gene set analysis on summary statistics from recent multivariate GWAS  
365 studies on cerebrocortical<sup>44</sup> or hippocampal<sup>45</sup> morphological features yielded similar (for cortical  
366 features) or significantly weaker (hippocampal features) enrichment effects (Figure 5d, see Online  
367 Methods for processing pipeline).

368

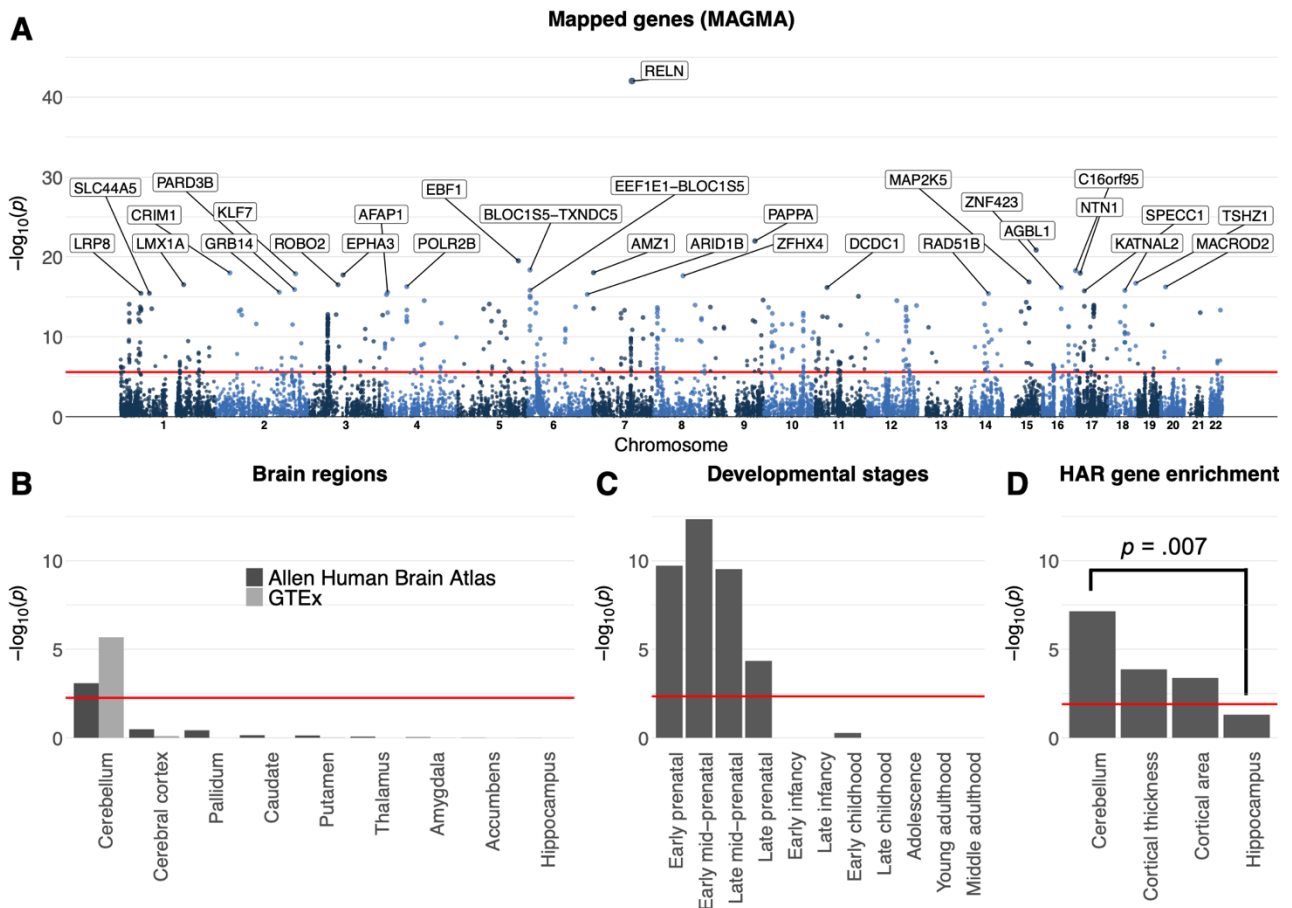

369

370

371

372

373

374

375

376

377

378

379

380

381

382

383

384

385

386

387

388

389

**Figure 5: Gene mapping reveals selective enrichment for cerebellar and prenatal brain tissue, as well as for genes linked to human accelerated regions.** **A:** MAGMA mapped the full range of SNPs from the multivariate GWAS to 19,329 protein-coding genes, 534 of which were genome-wide significant (Bonferroni corrected threshold marked with red line), with the 30 most significant genes labeled in the gene-based Manhattan plot. **B-C:** MAGMA gene-property analyses revealed selective brain expression in the cerebellum and during prenatal developmental stages. **D:** MAGMA gene-set analysis revealed significant enrichment for sets of genes previously linked to human accelerated regions (HARs). Figure 4d also shows results from comparative analyses using summary statistics from other multivariate GWASs of MRI-based brain, as well as significant results from statistical tests comparing beta-weights for HAR-linked genes across multivariate brain features. Horizontal red lines mark the Bonferroni-corrected significance threshold for each subplot. See Supplementary Data 14-17 for full results.

**Genes linked to human cerebellar morphology show enrichment for gene sets linked to selective cerebellar gene expression, altered cerebellar morphology in mouse models, human clinical/anthropometric traits, as well as specific biological processes and pathways.** In line with the continuous brain tissue gene expression results described above, we also observed significant and relatively selective enrichment for smaller curated sets of genes previously found to be highly and selectively expressed in mouse (Figure 6A, Supplementary Data 18) and human (Figure 6C, Supplementary Data 20) cerebellar brain tissue, as well as for sets of genes previously shown to affect cerebellar morphology in mouse gene perturbation experiments (Figure 6B,

390 Supplementary Data 19) and various clinical conditions and anthropometric traits in humans (Figure  
 391 6D, Supplementary Data 21). The most significant gene ontology and curated gene sets from the  
 392 MSigDB<sup>52,53</sup> database were related to brain development (e.g., neurogenesis, axon guidance and  
 393 neuron differentiation, Figure 6E, Supplementary Data 22), and highlighted the reelin signaling  
 394 pathway (Figure 6F, Supplementary Data 23).  
 395

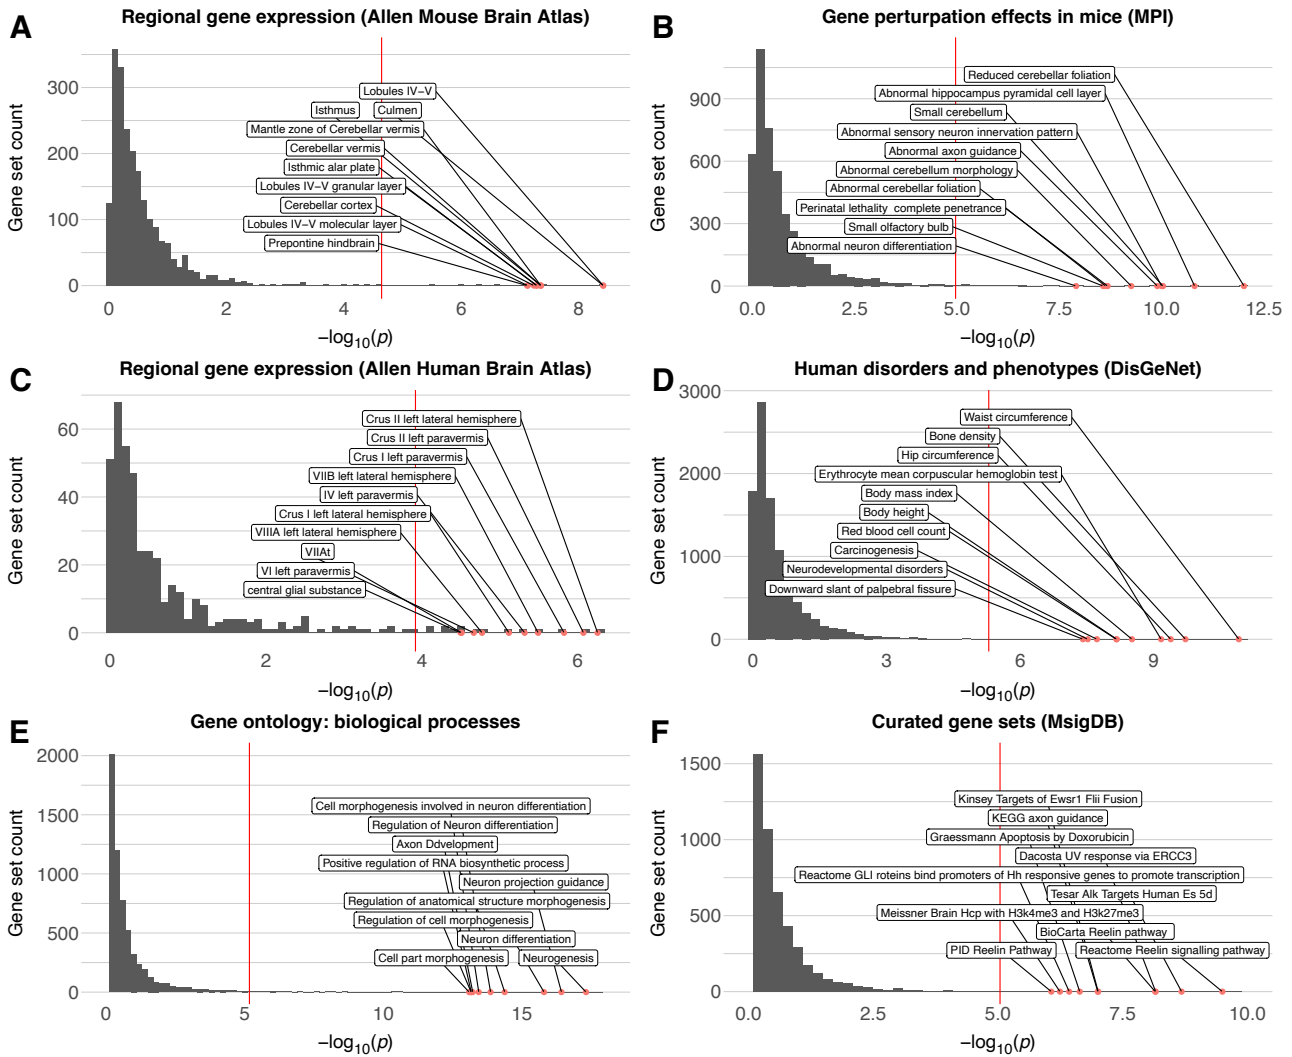

396  
 397 **Figure 6: Gene mapping reveals selective enrichment across brain tissues and curated gene sets.**  
 398 MAGMA gene-set analyses revealed significant enrichment for sets of genes previously linked to preferential  
 399 expression in human (A) and mouse (C) cerebellar tissue, as well as effects on cerebellar morphology (and  
 400 other brain phenotypes) in mouse gene perturbation experiments (B) and human clinical disorders and  
 401 phenotypes (D). Significant gene ontology terms were related to neural development (E), while curated gene  
 402 sets highlighted the Reelin signaling pathway (F). Across all subplots the x-axis shows the  $-\log_{10}(p)$ , the  
 403 y-axis marks the number of gene sets, and the top 10 most significant gene-sets are labelled. Red lines mark  
 404 the Bonferroni-corrected significance threshold for each subplot. See Supplementary Data 18-23 for full  
 405 results.  
 406

407 As can be seen in Figure 5A (and Supplementary Data 14), *RELN* (encoding the protein Reelin) was  
408 also the most significant gene mapped by MAGMA. See also Supplementary Figure 14 for a regional  
409 locus plot showing the 12 lead SNPs mapped to *RELN* and their associated z-score maps.

410

#### 411 **Gene mapping reveals sets of plausible causal genes.**

412 In addition to the gene-based mapping strategy using all SNPs described above (MAGMA), we also  
413 mapped candidate SNPs to genes using two complementary gene mapping strategies: 1) positional  
414 mapping of deleterious SNPs (defined as having a CADD-score<sup>54</sup> > 12.37); and 2) mapping of SNPs  
415 previously shown to affect gene expression in cerebellar tissues (i.e., eQTL mapping). Across all  
416 three strategies, we mapped a total of 674 unique genes; 531 using MAGMA, 310 using positional  
417 and 197 using eQTL mapping (see Figure 7A and Supplementary Data 24). 298 genes were  
418 identified by at least two strategies, while 65 genes were mapped by all three strategies. Out of these  
419 674 genes, 61 have previously been associated with cerebellar pathology in humans and/or altered  
420 cerebellar morphology in mouse gene perturbation experiments, while 121 have been linked to  
421 human accelerated regions (Supplementary Data 24). As can be seen in Figure 7B and  
422 Supplementary Data 24, the 674 genes mapped to cerebellar morphology showed some overlap  
423 with genes mapped to hippocampal<sup>45</sup> and cerebrocortical<sup>44</sup> morphology using the same mapping  
424 strategies, but 264 genes (39%) appeared relatively specific to the cerebellum.

425 Results from gene set analyses on the 674 mapped genes (Figure 7, Supplementary Data  
426 25-29) largely mirrored results from the MAGMA analyses described above, but in addition revealed  
427 that this set of 674 mapped genes was also enriched for gene sets associated with several complex  
428 clinical phenotypes and anthropometric traits in humans, including cognitive ability, neuroticism and  
429 schizophrenia (Figure 7F, Supplementary Data 29).

430 Of note, while the full set of mapped genes showed significant enrichment for sets of genes  
431 known to alter cerebellar morphology in mouse mutation or knock-down experiments  
432 (Supplementary Data 27), we also note that 613 of the 674 mapped genes have not to our knowledge  
433 previously been linked to cerebellar development, anatomy or pathology in mice or humans  
434 (Supplementary Data 24), and thus constitute potential targets for future gene perturbation  
435 experiments in animal models.

436 Restricting the above analyses to the 298 genes mapped across at least two strategies did  
437 not markedly affect the results (Supplementary Data 25-29, final columns).

438

439

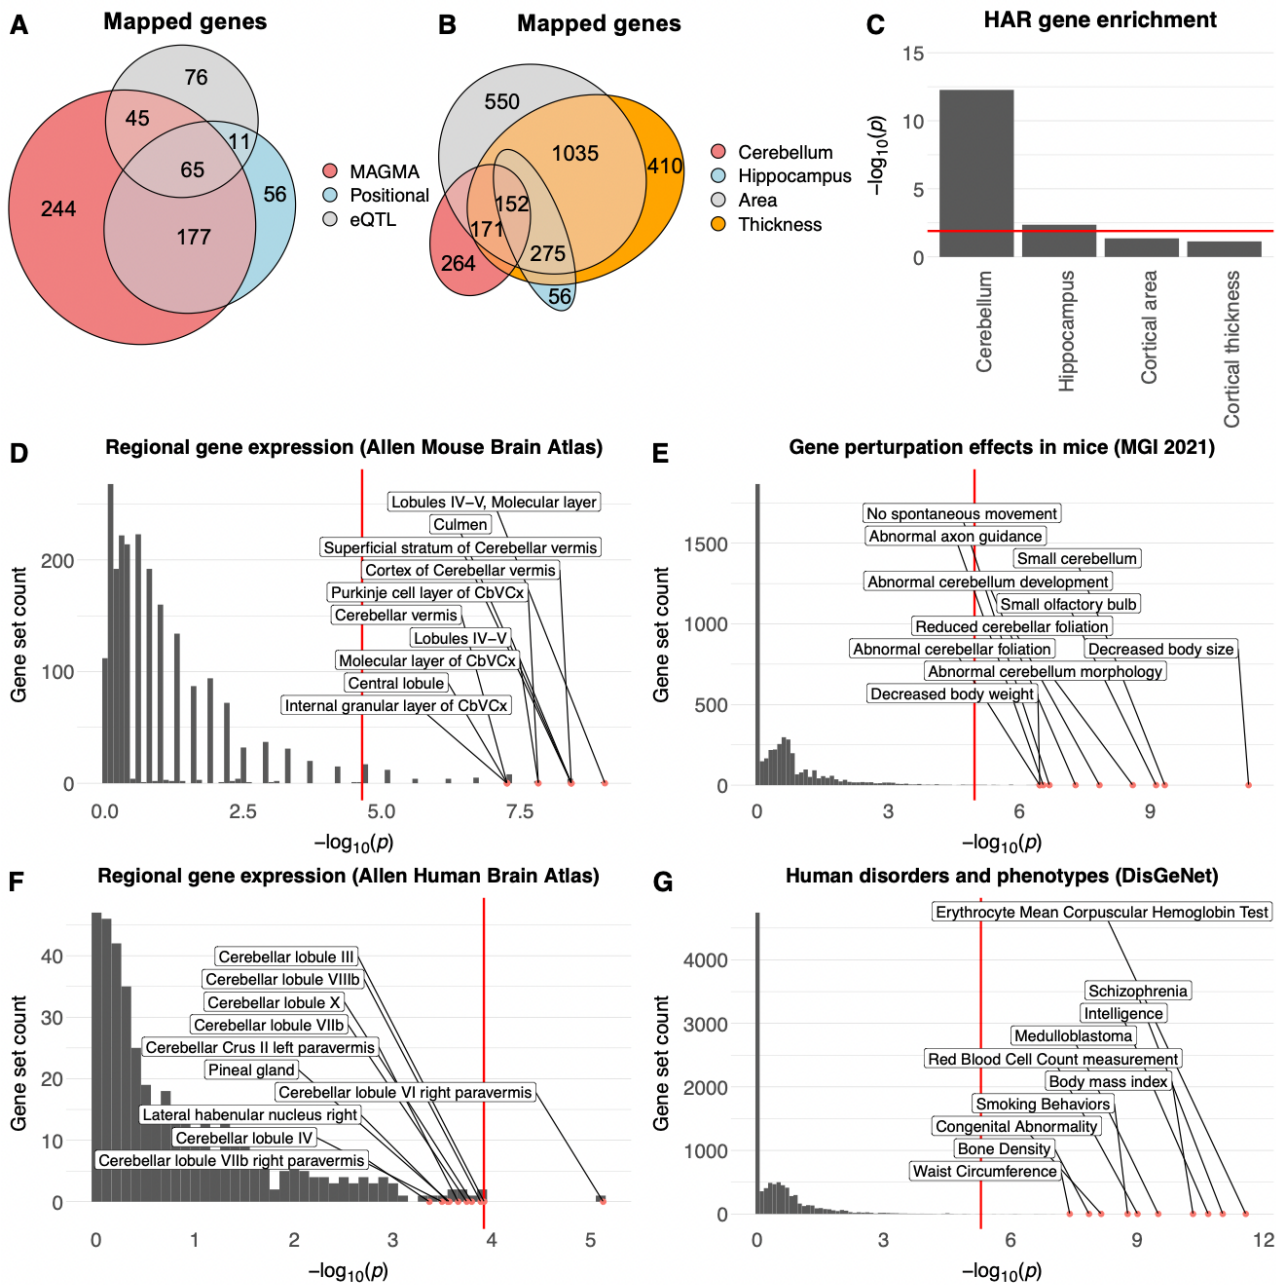

440

441

442

443

444

445

446

447

448

449

450

451

452

453

**Figure 7: Mapping and functional characterization of plausible causal genes.** The 674 plausible causal genes mapped using three complementary strategies (A) show partial overlap with genes mapped to hippocampal<sup>45</sup> and cerebrocortical<sup>44</sup> morphology (B); significant enrichment for sets of genes linked to human accelerated regions (HAR) (C); selective expression in the cerebellum in mice (D) and humans (E), as well as effects on cerebellar morphology in mouse gene perturbation studies (F) and human disorders and anthropometric phenotypes (G). Across all subplots the x-axis shows the  $-\log_{10} p$ -value, the y-axis marks the number of gene sets, and the top 10 most significant gene-sets are labelled. Red lines mark the Bonferroni-corrected significance threshold for each subplot. See Supplementary Data 24-29 for full results.

### Cerebellar morphology shows significant genetic overlap with psychiatric disorders.

We finally tested for overlap between the multivariate genetic profile for cerebellar morphology and genetic profiles for five major developmental/psychiatric disorders (attention deficit hyperactivity disorder: ADHD; autism spectrum disorder: ASD; bipolar disorder: BIP; major depressive disorder:



454 MDD; and schizophrenia: SCZ) using conditional/conjunctive FDR analysis<sup>55</sup>. As can be seen in  
 455 the conditional QQ-plots in Figure 8, these analyses revealed clear patterns of enriched association  
 456 with the clinical phenotypes when selecting subsets of SNPs with increasingly stronger association  
 457 with cerebellar morphology (Fig. 8A and figure insets in (C-F).

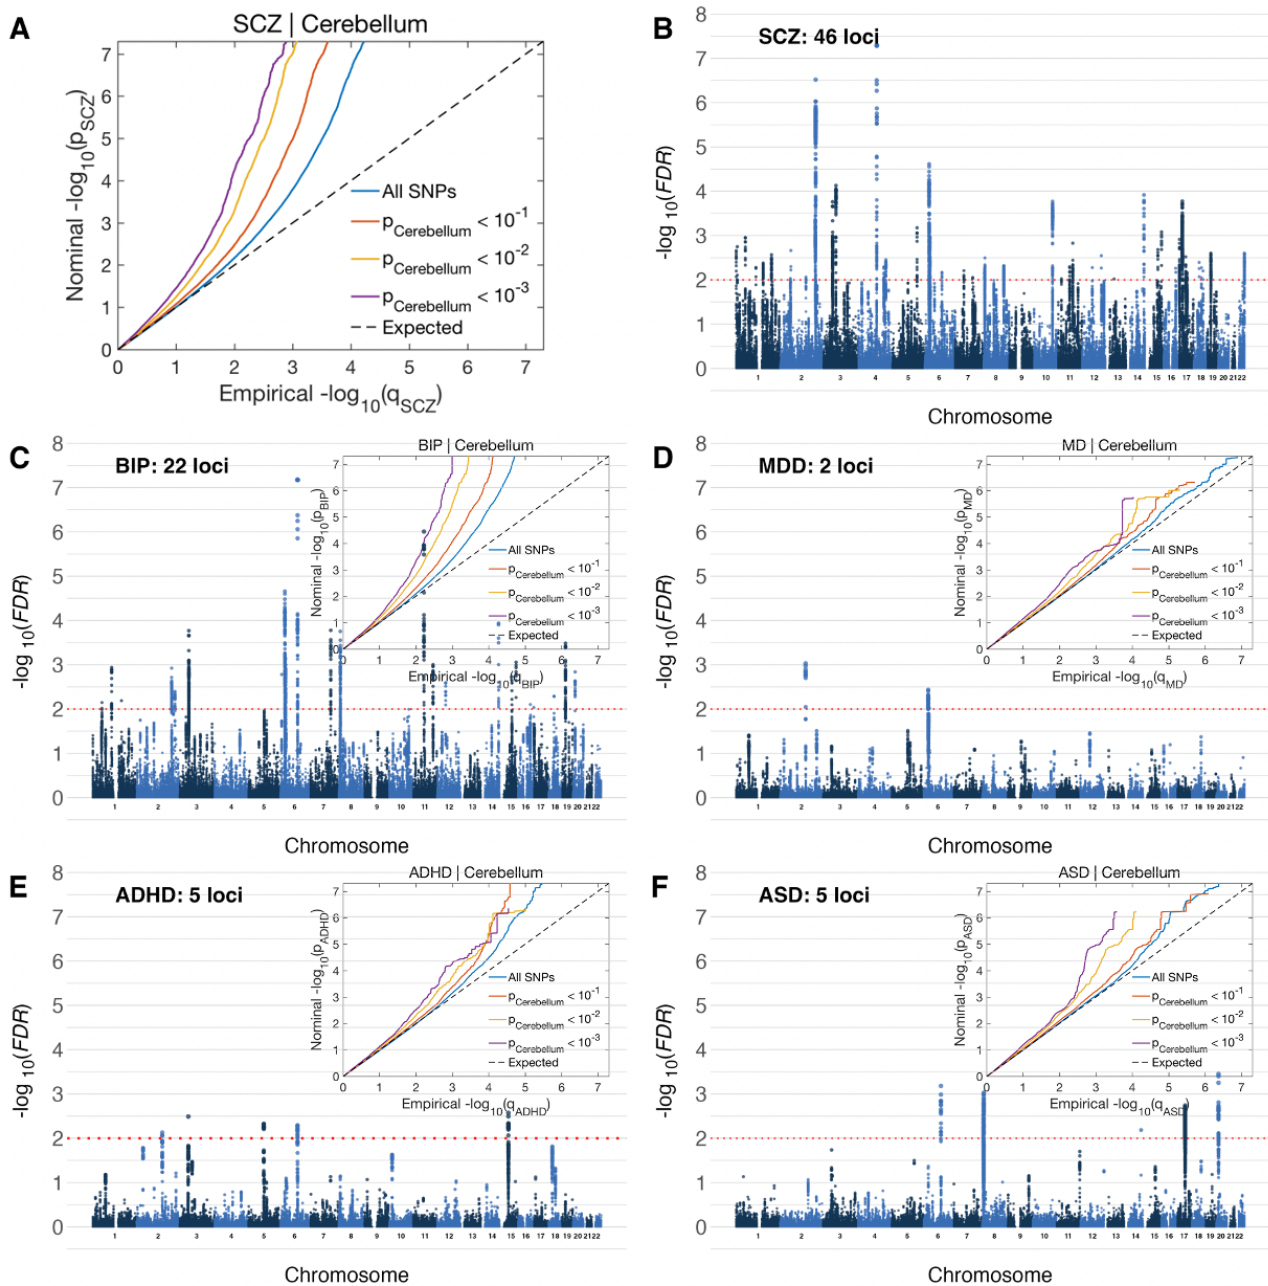

458  
 459 **Figure 8: Genetic variants influencing cerebellar morphology overlap with variants associated with**  
 460 **five major mental disorders.** Conditional QQ plots (A and figure insets in C-F) show an incremental  
 461 incidence of association with five mental disorders (leftward deflection) as a function of the significance of  
 462 association with cerebellar morphology. Manhattan plots show SNPs with significant association with both  
 463 traits, thresholded at a conjunctive FDR threshold of  $p > .01$  (red dotted line). SCZ: Schizophrenia; BIP:  
 464 Bipolar Disorder; MDD: Major Depressive Disorder; ADHD: Attention Deficit Hyperactivity Disorder; ASD:  
 465 Autism Spectrum Disorders.  
 466

467 See also Supplementary Figure 15 for QQ-plots depicting the reverse association, i.e., enriched  
468 association with cerebellar morphology when conditioning on the association with  
469 developmental/psychiatric disorders. Specific genetic variants jointly influencing the two phenotypes  
470 were identified using conjunctive FDR analyses at a conservative statistical threshold of  $p < .01$ .  
471 Results revealed shared genetic loci with all disorders; namely 48 with SCZ, 22 with BIP, 2 with  
472 MDD, 5 with ADHD and 5 with ASD (Figure 6; Supplementary Data 30-34). We mapped lead and  
473 candidate SNPs for each of these loci to genes using positional and eQTL mapping and checked for  
474 gene overlap across disorders (Supplementary Data 35). Of note, the *LRP8* gene (a HAR-linked  
475 gene<sup>50,51</sup> encoding a Reelin receptor) emerged from the conjunctive FDR analyses of both BIP and  
476 SCZ, thus again highlighting the Reelin signaling pathway.

477 To complement these multivariate analyses, we also conducted a set of univariate analyses,  
478 using LD-score regression<sup>32</sup> to calculate the genetic correlations between each individual cerebellar  
479 feature and the five developmental/psychiatric disorders.

480

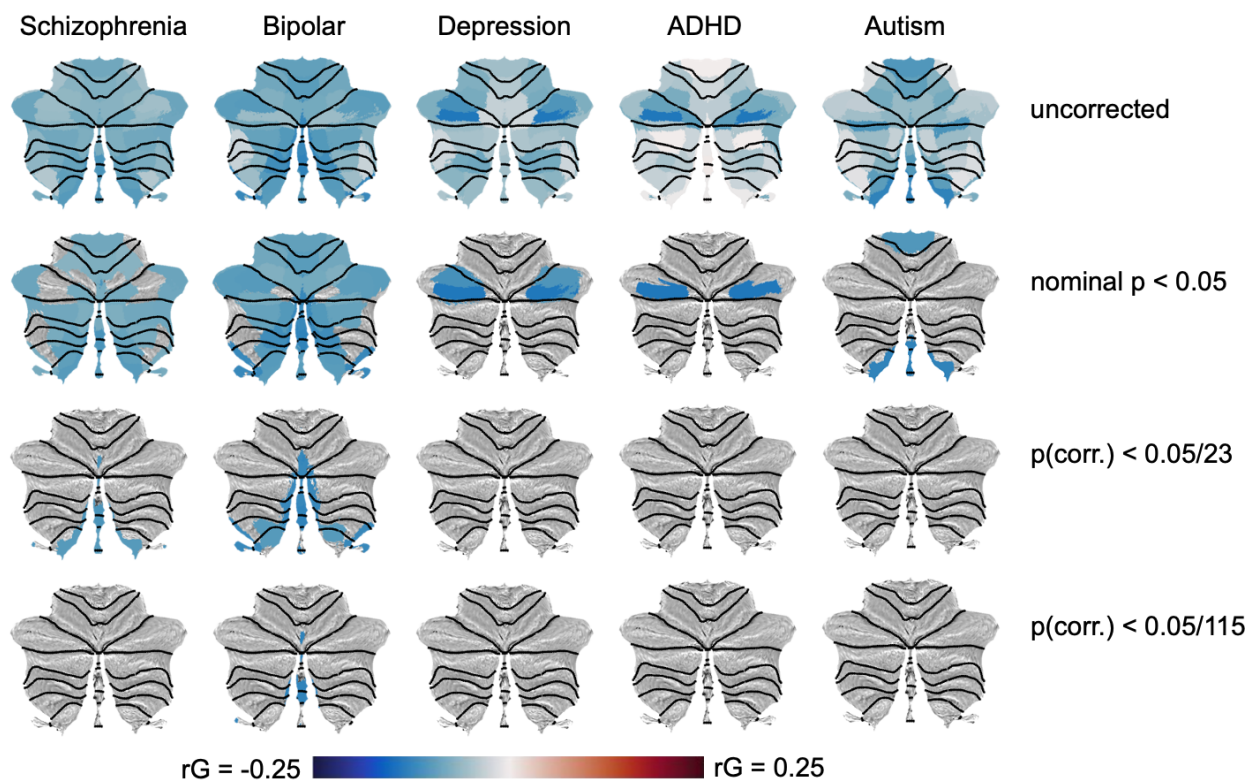

481

482 **Figure 9: Univariate genetic correlations between cerebellar morphological features and five**  
483 **major mental disorders are negative.** The top row display unthresholded genetic correlations,  
484 while these are filtered at increasingly strict statistical thresholds in the following rows, i.e. nominal  
485  $p$ -value  $< .05$  (second row); Bonferroni correction for the 23 cerebellar features tested (third row);  
486 Bonferroni correction for both 23 features and 5 clinical conditions (bottom row). Black dotted  
487 lines denote lobular boundaries.

488

489 As can be seen in the first row of Figure 9 (and Supplementary Data 36), genetic correlations with  
490 cerebellar morphological features were predominantly negative across diagnoses, indicating that  
491 genetic variants associated with a clinical diagnosis tended to also be associated with reduced  
492 cerebellar volumes (with 42 out of 115 tested associations showing nominally significant negative  
493 correlations; Fig 9, second row). However, all univariate genetic correlations were relatively weak,  
494 and only a few negative genetic correlations with BIP and SCZ survived Bonferroni correction for the  
495 23 features tested. When also correcting for the five clinical conditions, only the negative correlation  
496 between BIP and cerebellar feature 23 (primarily overlapping vermal lobules VIIIa and VIIIb)  
497 remained significant.

498 Supplementary Data 37 show genetic correlations between the five disorders and the ten  
499 comparison brain phenotypes, as well as total cerebellar volume. In general agreement with the  
500 observed pattern for regional cerebellar features, total cerebellar grey matter volume showed  
501 nominally significant negative genetic correlations with BIP (rg: -.10; p = 0.0052) and SCZ (rg: -.09;  
502 p = 0.0133). Pallidal volume also showed nominally significant negative genetic correlations with  
503 these two disorders (BIP: rg: -.10; p = 0.0087; SCZ: rg: -.08; p = 0.0172, while ADHD displayed  
504 negative genetic correlations with estimated total intracranial volume (rg: -.15; p = 0.0003) and total  
505 cortical surface area (rg: -.14 ; p = 0.0065), as well as a positive genetic correlation with hippocampal  
506 volume (rg: .13; p = 0.0164). Finally, MDD showed nominally significant negative genetic correlations  
507 with volumes of the hippocampus (rg -.08: p = 0.025) and thalamus (rg: -.09; p = 0.0258). Only the  
508 negative genetic correlation between ADHD and estimated total intracranial volume survived  
509 Bonferroni correction across the 55 tests performed.

510

511

## 512 Discussion

513

514 The current study identified novel features of the genetic architecture of cerebellar morphology,  
515 supported the notion of recent changes over human evolution, implicated specific neurobiological  
516 pathways, and demonstrated genetic overlap with major mental disorders.

517 With respect to the main features of cerebellar morphology, it is worth noting that results from  
518 our data-driven decomposition of cerebellar grey matter maps (which was not informed by genetic  
519 data), the genetic correlation analyses of the chosen 23-feature solution and gene expression data  
520 from the Allen Human Brain Atlas all converge on a similar general pattern. The first boundary to  
521 emerge in the data-driven decompositions ran along the horizontal fissure separating Crus I and II  
522 of lobule VII, reflecting its centrality in characterizing phenotypic variability in cerebellar morphology  
523 at the population level. Of note, this boundary also emerged from clustering of the 23 cerebellar  
524 morphological features based on their bivariate genetic correlations or gene expression profiles  
525 (based on the Allen Human Brain Atlas). This latter finding essentially mirrors results from a recent  
526 report using a different analysis strategy on the same gene expression data<sup>56</sup>. Interestingly, the  
527 horizontal fissure has been suggested to mark the border between two separate cerebellar

528 representations of the cerebral cortex, with a possible third representation in lobules IX-X<sup>57</sup>. The  
529 current cerebellar results thus complement previous work on the hierarchical genetic organization of  
530 the cerebral cortex, which has identified the Rolandic fissure (separating the frontal and parietal  
531 lobes) as a main boundary with respect to genetic effects of effects of surface area<sup>58</sup>, as well as a  
532 superior-inferior gradient for genetic influences on cortical thickness<sup>59</sup>

533 Our multivariate GWAS using MOSTest identified 351 independent GWS loci associated with  
534 cerebellar morphology, increasing the yield ~35-fold relative to analyzing total cerebellar volume and  
535 ~6-fold relative to performing a set of univariate analyses on the same regional features in our current  
536 sample. 329 (94%) loci from the multivariate analyses were replicated in an independent sample,  
537 indicating robust results. After applying a liberal threshold to summary statistics from previous well-  
538 powered studies, we find that 228 (65%) of our reported loci are novel. Importantly, among the genes  
539 mapped to these novel loci we find several that are known to play important roles in cerebellar  
540 development in mice (e.g., *RORA*<sup>60</sup>, *FGF8*<sup>61</sup> and *BAHRL1*<sup>62</sup>, see Supplementary Data 23). While  
541 candidate SNPs associated with cerebellar morphology partially overlap with SNPs previously  
542 mapped to other multivariate brain phenotypes, we note that a substantial number of SNPs appear  
543 to be relatively selectively linked to cerebellar morphology, a finding that is in line with the distinct  
544 gene expression profile found for the cerebellum<sup>35</sup>.

545 SNP- and gene-level results from the current study also bolster – and refine – the notion of  
546 relatively recent changes in cerebellar morphology over human evolution<sup>2,4,15,16</sup>. Specifically, we  
547 found that lead SNPs associated with cerebellar morphology were enriched for SNPs with an  
548 estimated age of 20-40 thousand years. This overlaps the Upper Paleolithic (10-50k years ago), a  
549 period characterized by rapid cultural evolution, and coinciding with the first evidence of several  
550 uniquely human behaviors (often referred to as behavioral modernity), such as the recording of  
551 information onto objects<sup>48</sup>. Converging evidence for changes in brain anatomy around this  
552 evolutionary period comes from the fossil skull record, where only fossils dated less than 35,000  
553 years old fall within the range of shape-variation seen in modern humans<sup>63,64</sup>. Of note, one key  
554 feature of modern skulls is their “globular” shape, in part characterized by an enlarged posterior  
555 fossa (the cranial compartment housing the cerebellum)<sup>63,64</sup>. A similar pattern of enrichment for  
556 recent evolutionary time bins (20-60 thousand years ago) was also found when analyzing lead SNPs  
557 derived from previous studies on multivariate cerebro-cortical<sup>44</sup> morphology.

558 Gene level analyses further showed that genes associated with inter-individual variation in  
559 cerebellar morphology are enriched for genes linked to human accelerated regions (HARs)<sup>50</sup> of the  
560 genome. HARs denote previously conserved regions of the genome that were subject to a burst of  
561 changes in humans after the divergence of humans from chimpanzees about 6-8 million years ago<sup>50</sup>.  
562 Of note, a recent GWAS on total cerebellar volume found no enrichment for HAR-linked genes<sup>14</sup>,  
563 suggesting that SNPs associated with regional cerebellar variation may be driving this effect. When  
564 comparing this finding with results from other multivariate brain phenotypes, we observed that HAR  
565 gene enrichment was nominally stronger for cerebellar morphology than for vertex-wise

566 cerebrocortical thickness and area, and significantly stronger than for hippocampal regional volumes  
567 (Figure 5D).

568 Together, these SNP- and gene-level results suggest that genetic variants influencing  
569 cerebellar morphology in modern humans have been subject to selection over relatively recent  
570 human evolution, and that cerebellar changes – in concert with other brain regions – may thus have  
571 played a central part in the emergence of uniquely human cognitive abilities.

572 Results from the MAGMA gene property and gene set analyses bolster our confidence in the  
573 genetic signal by showing selective gene expression in human cerebellar brain tissue across two  
574 independent datasets (Allen Human Brain Atlas and GTEx.8) and significant enrichment for sets of  
575 genes which have previously been shown to affect cerebellar morphology in mouse gene  
576 perturbation experiments. The MAGMA results further show significant enrichment for sets of genes  
577 known to play key roles in neurodevelopment (e.g., neurogenesis & axon guidance) and preferential  
578 expression in prenatal brain tissue, thus supporting a primarily developmental origin of genetically  
579 determined effects on adult cerebellar morphology. Of note, our MAGMA enrichment analysis of  
580 curated gene sets strongly implicated the Reelin signaling pathway. Indeed, both the gene coding  
581 for the Reelin protein (*RELN*) and genes coding for its two receptors (*LRP8* & *VLDLR*) were identified  
582 across at least two gene mapping strategies, with *RELN* emerging as the single most significant  
583 gene by MAGMA. The Reelin pathway is known to play important roles in neurodevelopment (e.g.  
584 neuronal migration), and mutations in the *RELN* and *VLDLR*<sup>65</sup> (and to a lesser extent *LRP8*; also  
585 known as ApoER2<sup>66</sup>) have been associated with cerebellar malformations and/or dysfunction. *LRP8*  
586 is also among the genes linked to human accelerated regions (HARs) of the genome.

587 The sets of genes mapped by the three complementary mapping strategies provide a  
588 database for future studies investigating the genetic architecture of cerebellar morphology. For  
589 instance, we mapped 616 genes associated with inter-individual variability in human cerebellar  
590 morphology that have not yet to our knowledge been examined in mouse gene perturbation  
591 experiments and/or associated with cerebellar pathology in humans. Among these, we highlight  
592 *MAP2K5* and *GRB14*, two HAR-linked genes mapped across all strategies and associated with lead  
593 SNP p-values <1e-50, but whose functions in the brain are largely unknown.

594 The reported results for previously discovered variants, loci and genes add important  
595 information regarding regional effects on cerebellar morphology. For instance, while genetic variants  
596 linked to the *RELN* gene have previously been associated with volumes of cerebellar vermal lobules  
597 VI-X and hemispheric lobule IX<sup>42,43</sup>, we here mapped 12 lead SNPs to *RELN* showing heterogeneous  
598 effects across the entire cerebellar cortex (but with peak effects overlapping previously described  
599 midline and posterior cerebellar regions, see Supplementary Figure 13).

600 The observed genetic overlap between cerebellar morphology and the five mental disorders  
601 reinforces the recent notion of the cerebellum as a key brain structure in complex clinical traits and  
602 disorders<sup>6-10</sup>. Across the five diagnoses, the strongest evidence for genetic overlap with cerebellar  
603 morphology was found for SCZ and BIP, likely at least in part because these disorder GWASs were

604 relatively well-powered. While an in-depth discussion of genetic loci jointly influencing psychiatric  
605 disorders and cerebellar morphology is beyond the scope of this report, we note that the Reelin  
606 pathway again emerges in the genetic overlap analyses for SCZ and BIP. Specifically, the current  
607 finding of *LRP8* (a reelin receptor, and HAR-linked gene) as one of the genes jointly associated with  
608 cerebellar morphology and the aforementioned severe mental disorders points towards a potential  
609 molecular pathway involved in the cerebellar abnormalities previously reported in SCZ<sup>10,67,68</sup> and  
610 BIP<sup>67,68</sup>. Indeed, in line with its key importance for brain development and function, the Reelin  
611 pathway is also increasingly seen as relevant for a wide range of neurodevelopmental, psychiatric  
612 and neurodegenerative disorders<sup>69</sup>. Of particular relevance to the current findings, converging  
613 evidence supports *LRP8* as a key susceptibility gene for psychosis<sup>70</sup>.

614 The main limitations of the current study concern the ancestral homogeneity of the sample,  
615 the sample size, the exclusion of very rare genetic variants and the limitations on follow-up analyses  
616 placed by multivariate (relative to univariate) test-statistics. Limiting the sample to participants of  
617 European ancestry was deemed necessary considering the current state of the multivariate GWAS  
618 methods used but may limit the generalizability of our findings. Second, while the current sample  
619 size is large in comparison with previous imaging genetics studies, it is still relatively small in  
620 comparison to GWASs of other complex human phenotypes (e.g., intelligence, with a current  $n$  of >  
621 3 million<sup>71</sup>). Moreover, very rare genetic variants ( $MAF < 0.005$ ) were excluded from the current  
622 multivariate GWAS, but are likely to include a number of variants with relatively large effect sizes on  
623 complex human traits<sup>72</sup>. Thus, future studies using larger and more diverse samples – as well as  
624 whole exome and/or genome sequencing – are likely to discover more of the genetic variants  
625 associated with cerebellar structure. Finally, while multivariate GWAS increases the power to detect  
626 genetic variants associated with brain phenotypes relative to univariate approaches, it also places  
627 important limitations on the possible follow-up analyses (e.g., genetic correlations or Mendelian  
628 randomization), which require directional effects. Although comprehensive follow-up analyses of  
629 univariate GWAS results fall beyond the scope of the current report, we have made all summary  
630 statistics (univariate and multivariate) publicly available for the research community.

631 In conclusion, the current results enhance our understanding of the genetic architecture of  
632 human cerebellar morphology, provide supporting evidence for cerebellar morphological changes  
633 during the last ~6-8 million years of human evolution, and reinforce the notion of cerebellar  
634 involvement in several mental disorders by demonstrating significant genetic overlap.

635  
636  
637  
638  
639  
640  
641

642 **Materials and Methods:**

643

644 **Participants**

645 For our main analyses, T1-weighted MR images, demographic and genetic data from 39,178 UK  
646 Biobank participants were accessed using access number 27412. After removing 1043 participants  
647 who either had missing genetic data or had withdrawn consent (as of 19.11.2019), data from 38,135  
648 participants remained for the main analysis (age range: 44.6-82.1; mean age: 64.1, 51.9% female).  
649 Following quality control procedures (QC, see below), 28,212 UK Biobank participants of European  
650 descent remained for the main analyses (age range: 45.1-82.1; mean age: 64.1, 55.1% female), 910  
651 of which were identified as close relatives and removed prior to genetic analyses (see below), leaving  
652 a final sample for the primary analyses of 27,302 (age range: 45.1-82.1; mean age: 64.1, 54.9%  
653 female). For the replication sample, we accessed a newer release of UK Biobank participants (n =  
654 48,045) and removed the 27,302 participants included in the primary analyses. After running through  
655 identical QC procedures as for the main sample (although applied only to the cerebellar features of  
656 primary interest and covariates included when analyzing these), the replication sample consisted of  
657 11,264 unrelated UK Biobank participants of European descent (age range: 46.1-83.7; mean age:  
658 66.8, 46.9% female). The UK Biobank was approved by the National Health Service National  
659 Research Ethics Service (ref. 11/NW/0382),

660

661 **Initial MR image processing**

662 MRI data was first processed using the recon-all pipeline in FreeSurfer 5.3<sup>73</sup>, yielding a large number  
663 of brain features. Of these, we retained measures of estimated total intracranial volume (eTIV), total  
664 cerebro-cortical surface area, average cerebro-cortical thickness as well as the volumes of seven  
665 subcortical structures (hippocampus, amygdala, thalamus, pallidum, putamen, caudate nucleus and  
666 nucleus accumbens) as cerebral (or global, in the case of eTICV) comparison regions for our main  
667 cerebellar analyses. These anatomical features were averaged across hemispheres, yielding a total  
668 of ten comparison phenotypes.

669 Next, the bias-field corrected T1-images from the FreeSurfer analyses were analyzed using  
670 the cerebellum-optimized SUIT-toolbox<sup>74</sup>. In brief, SUIT isolates the cerebellum and brain stem from  
671 T1-images, segments cropped images into grey and white matter, and normalizes these tissue  
672 probability maps to a cerebellum-specific anatomical template. After multiplying the grey matter  
673 maps with the Jacobian of the transformation matrix (i.e. preserving information about absolute  
674 volumes), we extracted grey matter intensity values overlapping the 28 cerebellar lobular labels in  
675 the probabilistic SUIT-atlas. Since cerebellar volumetric indices showed high correlations across the  
676 two hemispheres (range: .87-.96; mean: .94), we created mean volumetric measures by averaging  
677 across hemispheres. Finally, we also combined the two smallest regions in the SUIT-atlas (Vermis  
678 Crus I and II located in the midline, average volumes: 2.9 and 293.4 mm<sup>2</sup>, respectively) to create a  
679 new Vermis Crus region (average volume: 296.2 mm<sup>2</sup>). This procedure reduced the 28 cerebellar

680 lobular volumes to 16 morphological indices. Total cerebellar grey matter volume was defined as the  
681 sum of all 28 lobular labels in the SUIT-atlas.

682

### 683 **Quality control procedures**

684 After excluding 4,818 UKBB participants of non-European origin, anatomical indices from the  
685 remaining 33,317 participants went through an iterative quality control (QC) procedure. First, we  
686 excluded 639 subjects with a mean Euler number below -217, indicating poor MRI quality<sup>31</sup>, as well  
687 as 12 subjects with missing and 90 subjects with zero values for any of the key cerebellar or cerebral  
688 brain measures of interest. Next, we used general additive models (GAM, implemented in the R-  
689 package “mgcv”) in order to model the effects of age (estimated as smooth functions for males and  
690 females separately, using cubic splines with 10 knots), sex, and scanner site on estimated total  
691 intracranial volume (eTIV) and mean thickness of the cerebral cortex. Specifically, we used the  
692 following formula:

693

```
694 GAM_model<-gam(Anatomical feature ~ s(Age, bs = "cs", by = Sex, k = 10) + as.factor(Sex)  
695 + as.factor(Scanner), data = UKBB_cerebellum_GWAS, select = TRUE, method = "REML")
```

696

697 Adjusted eTIV and mean cortical thickness indices were then created by reconstructing the data  
698 using the intercept and residuals from this model (i.e., removing effects of age, sex and scanner),  
699 before identifying and rejecting potential outliers, defined as +/- 3 median absolute deviations  
700 (MAD)<sup>75</sup> from the median of these adjusted values. Data from 350 subjects were rejected based on  
701 these criteria.

702 For the remaining cerebral anatomical measures, as well as total cerebellar volume, this  
703 procedure was then repeated, with scaled eTIV as an additional predictor. Since previous studies  
704 have demonstrated that the relationship between regional brain volumes and intracranial volume is  
705 not strictly allometric<sup>76,77</sup>, we estimated the effect of eTIV using cubic splines with 10 knots.  
706 Specifically, we used the following formula:

707

```
708 GAM_model<-gam(Anatomical feature ~ s(Age, bs = "cs", by = Sex, k = 10) + as.factor(Sex)  
709 + as.factor(Scanner) + s(eTIV_scaled, bs = "cs", k = 10), data = UKBB_cerebellum_GWAS,  
710 select = TRUE, method = "REML")
```

711

712 In order to be maximally sensitive to outliers in relative cerebellar volumes, we replaced eTIV with  
713 total cerebellar volume in the GAM models of cerebellar regions of interest (i.e., SUIT atlas regions),  
714 using the following formula:

715



```
716 GAM_model<-gam(Anatomical feature ~ s(Age, bs = "cs", by = Sex, k = 10) + as.factor(Sex)
717 + as.factor(Scanner) + total cerebellar volume, data = UKBB_cerebellum_GWAS, select =
718 TRUE, method = "REML")
```

719  
720 Adjusted cerebral and cerebellar indices were then created by reconstructing the data using the  
721 intercept and residuals from these models (i.e., removing estimated effects of age, sex and eTIV or  
722 total cerebellar volume), before rejecting 1792 participants with potential outlier cerebral indices and  
723 2222 participants with potential outlier cerebellar indices (MAD > +/- 3).

724  
725 This iterative QC procedure resulted in the rejection of 5,105 (i.e., 15.3%) of the original 33,317  
726 datasets, leaving 28,212 datasets for further analysis.

### 727 728 **Non-negative matrix factorization**

729 Cerebellar grey matter maps from 28,212 subjects passing the iterative QC procedure were  
730 smoothed with a 4mm full-width-half-maximum gaussian kernel in SPM12<sup>78</sup>, concatenated across all  
731 subjects and multiplied with a binary mask to isolate voxels located in the cerebellar cortex. This  
732 cerebellar cortical mask was constructed by multiplying a binary mask containing all 28 cerebellar  
733 lobules of the SUIT-atlas with the thresholded (at a value of 0.1) mean (unsmoothed) grey matter  
734 segmentation across all 28,212 participants.

735 The smoothed, concatenated and masked grey matter maps were then subjected to  
736 orthogonal projective non-negative matrix-factorization (OPNMF)<sup>26</sup>, in order to derive data-driven  
737 parcellations of regional cerebellar grey matter volume.

738 Non-negative matrix factorization (NNMF) is a blind source separation technique that allows  
739 structural brain networks to be described in a hypothesis-free, data-driven way by identifying patterns  
740 of covariation in the data. In contrast to alternative techniques, such as principal component analysis  
741 and independent component analysis, which yield components with both positive and negative  
742 weights that are often difficult to interpret, NNMF produces a sparse, positive-only, parts-based  
743 representation of the data. Importantly, NNMF has previously been proven effective in estimating  
744 covariance patterns in neuroimaging data while providing an easier interpretation of the results than  
745 other matrix decomposition techniques such as principal component analysis (PCA) or independent  
746 component analysis (ICA)<sup>26-30</sup>.

747 Briefly, NNMF decomposes an input matrix (voxels×subjects) into two matrices; a component  
748 matrix W (voxels×k) and a weight matrix H (k×subjects) where k is the number of components that  
749 needs to be specified by the user. Here, we used an implementation of orthogonal projective non-  
750 negative matrix factorization previously used in a number of publications<sup>26-30</sup> and downloaded from  
751 <https://github.com/asotiras/brainparts>. Given the large number of participants, we used the  
752 `opnmf_mem.m` function, which has been optimized for high-dimensional data. The function was run

753 with default parameter settings, except for maximal number of iterations, which was increased to  
754 200k, in order to ensure full convergence across all tested model orders.

755

### 756 **Model order selection**

757 Since the resulting parcellations are highly dependent on the requested number of components (or  
758 model order) specified, we tested model orders ranging from 2 to 30 in steps of 1, as well as from  
759 30 to 100 in steps of 10. Binarized winner-takes-all (i.e. assigning each voxel to the NNMF  
760 component with the highest loading) maps of the resulting decompositions projected onto a flattened  
761 representation of the cerebellar cortex are shown in Supplementary Figure 1.

762 Resulting NNMF decompositions were then evaluated based on two criteria; 1) how much of the  
763 variance in the original input data a given NNMF solution (i.e., component maps and subject weights)  
764 could explain and on 2) how reproducible the component maps were. As a metric of change in  
765 explained variance we used the change of the Frobenius norm of the reconstruction error. With  
766 increasing model orders the variance explained will always increase and the reconstruction error  
767 decrease, but if the decrease in the reconstruction error (or gradient) levels off, this indicates that  
768 the intrinsic dimensionality of the data might have been approximated (and that the subsequent  
769 increase in explained variance can largely be attributed to fitting random noise in the input data). In  
770 order to assess reproducibility, we split the full dataset into two equal sets (matched with respect to  
771 scanner site,  $n = 14,105$  and  $14,107$ , respectively), and ran NNMF on each split-half sample. For  
772 each set of independent NNMF parcellations, we computed two reproducibility indices. First, for each  
773 model order we matched components across split-half runs using the Hungarian algorithm<sup>79</sup>, before  
774 computing the spatial correlations between matched component maps, and extracting the median  
775 correlation across all matched components as our first reproducibility index. For our second  
776 reproducibility index, we first computed one overall – and categorical – component map using a  
777 “winner-takes-all”-approach, i.e., assigning each voxel to the NNMF component with the highest  
778 loading. Next, we calculated the adjusted Rand index (ranging from 0 to 1, with higher values  
779 indicating greater similarity<sup>80</sup>, across the two categorical parcellation maps for each model order as  
780 our second metric of reproducibility.

781 As can be seen in Supplementary Figure 2A, for lower model orders, increasing the model  
782 order resulted in a sharp decrease in the reconstruction error, indicating that models with more  
783 components resulted in a significantly better fit to the data. However, after reaching model orders  
784 between 15 and 30, the incremental improvement in fit from adding another component appeared to  
785 level off. As expected, the reproducibility results showed a largely inverse pattern, with both  
786 reproducibility indices decreasing with increasing model orders (Supplementary Figure 2B). Of note,  
787 for model orders up to 8, median spatial correlations across all matched components was above .99,  
788 indicating almost identical parcellations derived from the two independent samples. However, even  
789 for a model order of 100, the median pairwise correlation was still pretty high (.85), with 60% of  
790 components showing pairwise spatial correlations above 0.8, suggesting a reasonable level of

791 reproducibility even for the most fine-grained parcellation. Our reproducibility index for the  
792 categorical parcellations showed very similar results; the adjusted Rand index remained above .9  
793 for model orders up to 8, and then decreased to 0.56 at a model order of 100.

794 Given that the change in reconstruction error appeared to stabilize between 15 and 30  
795 components, indicating that the intrinsic dimensionality of the data had been approximated, we  
796 searched for the most reproducible parcellations within this range. Since the reliability estimates for  
797 model orders of 16 and 23 were very similar, with the 23-component solution explaining more of the  
798 variance in the original data, we used the 23-component parcellation for all further analyses.

## 800 **Adjustment and rank-order normalization of anatomical indices**

801 Prior to being subjected to genome-wide association analyses, we adjusted all anatomical indices  
802 for effects of age, sex, estimated total intracranial volume, scanner site, 40 genetic population  
803 components, genetic batch and mean Euler number (i.e, an index of MRI image quality<sup>31</sup>, averaged  
804 across hemispheres), using general additive models. Finally, all adjusted anatomical indices were  
805 inverse rank normalized<sup>81</sup>.

## 806 **Pre-processing of genetic data**

808 For all genetic analyses we made use of the UKB v3 imputed data, which has undergone extensive  
809 quality control procedures as described by the UKB genetics team<sup>82</sup>. After converting the BGEN  
810 format to PLINK binary format, we additionally carried out standard quality check procedures. We  
811 first selected White Europeans, as determined by a combination of self-identification as 'White  
812 British' and similar genetic ancestry based on genetic principal components, that had undergone the  
813 neuroimaging protocol. We then filtered out individuals with more than 10% missingness, removed  
814 SNPs with low imputation quality scores (INFO <.5), SNPs with more than 10% missingness, and  
815 SNPs failing the Hardy-Weinberg equilibrium test at  $p=1*10^{-9}$ . We further set a minor allele  
816 frequency threshold of 0.005 leaving 9,061,238 SNPs. After estimating the genetic relationship  
817 matrix (GRM) using genetic complex trait analysis (GCTA<sup>33</sup>), we finally removed 910 participants  
818 defined as close relatives using a threshold of 0.05 (approximately corresponding to 3<sup>rd</sup> cousins).

## 819 **Heritability estimation and genetic correlation analyses**

820 SNP-based heritability estimates for all morphological features – as well as the pairwise genetic  
821 correlations between cerebellar features - were estimated using genetic complex trait analysis  
822 (GCTA<sup>33</sup>).

## 824 **Univariate genome-wide association analyses**

825 Univariate analyses of total cerebellar grey matter volume and the ten cerebral comparison  
826 phenotypes were conducted using Plink v1.9.

828

829 **Genetic correlation analyses across discovery and replication samples and with previous**  
830 **published GWASs**

831 Genetic correlation analyses across different samples were conducted using LD-score  
832 regression<sup>32</sup>.

833

834 **Multivariate genome-wide association analyses**

835 For our main analysis, we used a recently developed multivariate analysis method (MOSTest<sup>36</sup>), to  
836 conduct a multivariate genome-wide association (GWA) analysis on cerebellar morphological  
837 features. MOSTest identifies genetic effects across multiple phenotypes, yielding a multivariate  
838 GWAS summary statistic across all 23 features, and provides robust (permutation based) test  
839 statistics. For mathematical details of the implementation, see van der Meer et al. (2020)<sup>36</sup>, for details  
840 on the software implementation see [github.com/precimed/mostest](https://github.com/precimed/mostest). MOSTest has been extensively  
841 validated in the original methods paper, including simulations and comparisons with other methods  
842 that have confirmed its solid discovery performance as well as an order of magnitude shorter runtime  
843 compared to other tools<sup>36</sup>. For comparison to standard univariate approaches, we also performed  
844 univariate GWASs (extracted from the univariate stream of MOSTest<sup>36</sup> and identical to results from  
845 analyses using Plink).

846

847 **Multivariate replication analysis**

848 To ensure that not only single locus lead SNP associations replicate, but that also the multivariate  
849 pattern of these associations are consistent in the discovery and replication sample, we implemented  
850 a multivariate replication procedure established in Loughnan et al.<sup>39</sup>. In brief, for each locus lead  
851 SNP identified in the multivariate analysis in the discovery sample, this procedure derives a  
852 composite score from the mass-univariate z-statistics and tests for associations of the composite  
853 score with the genotype in the replication sample (for mathematical formulation see Loughnan et  
854 al.<sup>39</sup>). 12 of the 351 locus lead SNPs could not be tested as they were not available in the replication  
855 sample after QC. For the remaining SNPs we report the percent of loci replicating at  $P < 0.05$ , the  
856 percent remaining significant after Bonferroni correction for 339 conducted tests, and the percent of  
857 lead SNPs showing the same effect direction.

858

859 **Multivariate cerebral comparison phenotypes**

860 To compare key multivariate cerebellar results with other multivariate brain phenotypes, we  
861 downloaded summary statistics from two recent studies on cerebrocortical<sup>44</sup> and hippocampal<sup>45</sup>  
862 regional morphology. These comparison summary statistics were next analyzed using FUMA<sup>37</sup> as  
863 described for the main cerebellar results below.

864

865 **Locus identification and SNP annotation**

866 To identify genetic loci we uploaded summary statistics to the FUMA platform v1.4.1<sup>37</sup> Using the  
867 1000GPhase3 EUR as reference panel, we identified independent SNPs as SNPs below the  
868 significance threshold of  $P < 5e-8$  that were also in linkage equilibrium with each other at  $r^2 < 0.6$ .  
869 For each independent SNP, all candidate variants are identified as variants with LD  $r^2 \geq 0.6$  with the  
870 independent SNP. A fraction of the independent significant SNPs in approximate linkage equilibrium  
871 with each other at  $r^2 < 0.1$  were considered as lead SNPs. For a given lead SNP, the borders of the  
872 genomic locus are defined as min/max positional coordinates over all corresponding candidate  
873 SNPs. Finally, loci are merged if they are separated by less than 250kb.

874 FUMA further annotates associated SNPs based on functional categories, Combined  
875 Annotation Dependent Depletion (CADD) scores which predicts the deleteriousness of SNPs on  
876 protein structure/function<sup>54</sup>, RegulomeDB scores which predicts regulatory functions<sup>83</sup>; and  
877 chromatin states that shows the transcription/regulation effects of chromatin states at the SNP  
878 locus<sup>84</sup>. For all these analyses, we used default FUMA parameters.

879

## 880 **Genome-wide gene-based association and gene-set analyses**

881 We conducted genome-wide gene-based association and gene-set analyses using MAGMA v.1.10<sup>49</sup>  
882 (<http://ctg.cncr.nl/software/magma>). MAGMA performs multiple linear regression to map the input  
883 SNPs to 19,190 protein coding genes and estimates the significance value of that gene. Genes were  
884 considered significant if the  $P$  value was  $< 0.05$  after Bonferroni correction for 19,190 genes. The  
885 same procedure was used for MAGMA analysis of summary statistics for the three multivariate  
886 cerebral comparison phenotypes (cerebrocortical thickness and surface area<sup>44</sup> and regional  
887 hippocampal volumes<sup>45</sup>).

888 MAGMA gene-level statistics were next used as input to gene-property and gene-set  
889 analyses in MAGMA. Gene-property analyses test for associations between tissue specific gene  
890 expression profiles and disease-gene associations. The gene-property analysis is based on the  
891 regression model:  $Z \sim \beta_0 + E_t \beta_E + A \beta_A + B \beta_B + \epsilon$ , where  $Z$  is a gene-based Z-score converted from  
892 the gene-based P-value,  $B$  is a matrix of several technical confounders included by default (e.g.,  
893 gene size, gene density, sample size),  $E_t$  is the gene expression value of a testing tissue type and  $A$   
894 is the average expression across all tissue types in a data set (ensuring a test of expression  
895 specificity). We performed a one-sided test ( $\beta_E > 0$ ) which is essentially testing the positive  
896 relationship between tissue specificity and genetic association of genes.

897 We tested associations with two regional brain gene expression datasets (Allen Human  
898 Brain Atlas<sup>35</sup> and GTEx) and one developmental brain gene expression dataset (BrainSpan). For  
899 extraction and processing of gene expression data, see below.

900

## 901 **Extraction and processing of gene expression data**

902 *Allen Human Brain Atlas*: Regional microarray expression data were obtained from 6 post-mortem  
903 brains (1 female, ages 24.0--57.0, 42.50 +/- 13.38) provided by the Allen Human Brain Atlas<sup>35</sup>. Data

904 were processed with the abagen toolbox (version 0.1.3)<sup>34</sup> using two volumetric atlases; 1) the  
905 binarized 23-region NMF-derived parcellation of the cerebellar cortex; and 2) a modified version of  
906 the Desikan atlas were ROIs were merged to construct 9 bilateral regions: cerebellum, cerebral  
907 cortex, pallidum, caudate, putamen, thalamus, amygdala, nucleus accumbens and hippocampus.

908 First, microarray probes were reannotated using data provided by Arnatkeviciute, Fulcher  
909 and Fornito<sup>85</sup>; probes not matched to a valid Entrez ID were discarded. Next, probes were filtered  
910 based on their expression intensity relative to background noise<sup>86</sup>, such that probes with intensity  
911 less than the background in  $\geq 50.00\%$  of samples across donors were discarded, yielding 31,569  
912 probes. When multiple probes indexed the expression of the same gene, we selected and used the  
913 probe with the most consistent pattern of regional variation across donors (i.e., differential stability<sup>87</sup>),  
914 calculated with:

$$\Delta_S(p) = \frac{1}{\binom{N}{2}} \sum_{i=1}^{N-1} \sum_{j=i+1}^N \rho[B_i(p), B_j(p)]$$

915

916 where  $\rho$  is Spearman's rank correlation of the expression of a single probe,  $p$ , across regions  
917 in two donors  $B_i$  and  $B_j$ , and  $N$  is the total number of donors.

918 Here, regions correspond to the structural designations provided in the ontology from the  
919 AHBA. The MNI coordinates of tissue samples were updated to those generated via non-linear  
920 registration using the Advanced Normalization Tools (ANTs; <https://github.com/chrisfilo/alleninf>).  
921 Samples were assigned to brain regions in the provided atlas if their MNI coordinates were within 2  
922 mm of a given parcel. To reduce the potential for misassignment, sample-to-region matching was  
923 constrained by hemisphere and gross structural divisions (i.e., cortex, subcortex/ brainstem, and  
924 cerebellum, such that e.g., a sample in the left cortex could only be assigned to an atlas parcel in  
925 the left cortex<sup>85</sup>). All tissue samples not assigned to a brain region in the provided atlas were  
926 discarded. \n\nInter-subject variation was addressed by normalizing tissue sample expression  
927 values across genes using a robust sigmoid function<sup>88</sup>:

$$x_{norm} = \frac{1}{1 + \exp\left(-\frac{(x - \langle x \rangle)}{IQR_x}\right)}$$

928

929 where  $\langle x \rangle$  is the median and  $IQR_x$  is the normalized interquartile range of the expression of a  
930 single tissue sample across genes. Normalized expression values were then rescaled to the unit  
931 interval:

$$x_{scaled} = \frac{x_{norm} - \min(x_{norm})}{\max(x_{norm}) - \min(x_{norm})}$$

932

933 Gene expression values were then normalized across tissue samples using an identical  
934 procedure. Samples assigned to the same brain region were averaged separately for each donor

935 and then across donors, yielding two regional expression matrices with 23 and 9 rows, corresponding  
936 to brain regions, and 15,631 and 15,633 columns, corresponding to the retained genes. Prior to  
937 inclusion in MAGMA gene property analyses, we converted gene names for the modified Desikan  
938 atlas to ENSEMBL IDs, and calculated the mean expression value across tissue types (in order to  
939 include this as a covariate in MAGMA analyses testing for gene expression specificity), resulting in  
940 a 10 (regions) by (15,490) gene expression matrix.

941

942 *GTeX*: Text files containing median transcript per millimeter (TPM) values for 53 tissue types  
943 (*GTEX\_Analysis\_2017-06-05\_v8\_RNASeqCv1.1.9\_gene\_median\_tpm.gct.gz*) were down-loaded  
944 from the *GTEX* portal (<https://gtexportal.org/home/datasets/>). After selecting only expression data  
945 from the seven (out of nine) comparison brain regions present in the *GTEX* dataset (i.e., amygdala,  
946 caudate, cerebellum, cortex, hippocampus, nucleus accumbens and putamen), we filtered the data  
947 by only including genes with median TPM values above 1 for at least one of these tissue type  
948 (retaining 19,578 of 56,200 annotated genes). Following the procedure used by FUMA<sup>37</sup>, we next  
949 winsorized median TPM values at 50 (i.e., replaced TPM>50 with 50), before log transforming TPM  
950 with pseudocount 1 ( $\log_2(\text{RPKM}+1)$ ). Finally, we calculated the mean expression value across tissue  
951 types (in order to include this as a covariate in MAGMA analyses testing for gene expression  
952 specificity).

953

954 *BrainSpan data*: The analysis of BrainSpan data testing for developmentally specific brain  
955 expression was performed entirely within FUMA v1.4.1., using default parameters.

956

957 **Analysis of Human Dating Genome Data.** The Atlas of Variant Age for chromosomes 1-22 was  
958 downloaded from the Human Genome Dating (HGD) website: <https://human.genome.dating/>. This  
959 atlas contains more than 45 million SNPs which has been assigned dates of origin based on a  
960 recombination clock and mutation clock applied to two large-scale sequencing datasets (1000  
961 Genomes Project<sup>89</sup> and The Simons Genome Diversity Project<sup>90</sup>), with no assumptions made about  
962 demographic or selective processes<sup>46</sup>. The current study used the median joint age estimates from  
963 both clocks when analyzing SNPs present in both datasets in combination (i.e., 13,694,493 SNPs).

964 After merging dated SNPs with the 40,405,505 SNPs also present in the Haplotype  
965 Reference Consortium reference data (to add minor allele frequencies, MAF) and removing 715,083  
966 (5.2%) SNPs with missing MAF values as well as the very few (14,549, 0.1%) SNPs dated older  
967 than 2 million years, 12,960,066 SNPs remained.

968 548 of these dated SNPs were matched to lead SNPs linked to cerebellar morphology  
969 (defined as being in mutual LD at an  $r^2$  threshold  $< 0.1$ ), hereafter referred to as cerebellar-SNPs.  
970 Partially because very rare variants (Minor Allele Frequency/MAF  $< 0.005$ ) had been removed prior  
971 to the multivariate GWAS analysis, MAF was not equally distributed between these cerebellar-SNPs  
972 and the full range of dated SNPs in the HGD dataset. Importantly, MAF has been shown to be

973 systematically related to the estimated age of SNPs, with a higher proportion of low-MAF SNPs in  
974 more recent than in older time-bins<sup>46,47</sup>. Consequently, following the analysis approach established  
975 by Libedinsky et al.<sup>47</sup>, we first determined the MAF-distribution of cerebellar-SNPs (across eight  
976 bins: <0.0001; 0.0001-0.001; 0.001-0.01; 0.01-0.1; 0.1-0.2; 0.2-0.3; 0.3-0.4; 0.4-0.5) and selected  
977 random set of 2,892,270 SNPs from the HGD dataset that were matched to the cerebellar-SNPs in  
978 terms of MAF-bin distribution. Similar MAF-matched HDG subsets were created for lead SNPs  
979 associated with the two cerebrocortical comparison phenotypes, i.e., regional cerebrocortical surface  
980 area and thickness (862 and 714 lead SNPs, respectively).

981 For statistical inference we constructed null models (separate for each brain phenotype) by  
982 randomly drawing sets of SNPs (of equal size to the number of phenotype-linked lead SNPs) from  
983 the MAF-matched HGD-datasets and computing the histograms of estimated dates from 0 to 2  
984 million years ago (divided into 100 bins of 20,000 years) over 10,000 iterations. From these null  
985 models we extracted bin means as well as significance thresholds (defined as the upper and lower  
986 99.95<sup>th</sup> percentile of the null model (i.e. corresponding to a two-tailed threshold of 0.05 Bonferroni  
987 corrected across 100 bins).

988 For the validation analyses, we ran the same analyses based on the larger number (range  
989 across phenotypes: 1574-2883) of individual significant SNPs (defined as being in mutual LD at an  
990  $r^2$  threshold < 0.6).

## 991

### 992 **Positional and eQTL mapping of SNPs to plausible causal genes**

993 In addition to using MAGMA, we also mapped candidate SNPs to plausible causal genes using two  
994 complementary gene mapping strategies implemented in FUMA<sup>37</sup>: 1) Positional mapping of  
995 deleterious SNPs (defined as having a CADD-score > 12.37) and 2) eQTL-mapping of SNPs  
996 previously shown to alter gene expression in cerebellar tissue (from the BRAINEAC and GTEx v8  
997 databases). These analyses were run with default FUMA parameters. For the three multivariate  
998 cerebral comparison phenotypes (i.e., cerebrocortical thickness, cerebrocortical surface area and  
999 hippocampal regional volumes), we employed identical gene mapping procedures to our cerebellar  
1000 morphology results, except for the tissues chosen for eQTL mapping (cerebrocortical and  
1001 hippocampal, respectively).

## 1002

### 1003 **Gene set analyses using lists of mapped genes**

1004 All gene set analyses using mapped genes were conducted using the hypeR R-package<sup>91</sup>. This  
1005 package implements the hypergeometric test (also known as Fisher's exact test), which assigns a  
1006 p-value to gene-set overlaps given gene set sizes and the number of background genes. This R-  
1007 package also contains functions for downloading and/or formatting gene sets. The following gene  
1008 sets were accessed using hypeR: "Allen\_Brain\_Atlas\_up" (regional overexpression in the Allen  
1009 Muse Brain Atlas), "MGI\_Mammalian\_Phenotype\_Level\_4\_2021", "DisGeNet" (all from the enrichR  
1010 platform. In addition, we downloaded sets of genes with regional overexpression in the Allen Human



1011 Brain Atlas from the Harmonizome platform<sup>92</sup> and accessed a list of genes mapped to human  
1012 accelerated regions<sup>93</sup>. For all gene-set analyses we employed Bonferroni-correction by dividing the  
1013 p-value threshold of 0.05 by the number of gene sets included in each analysis.

1014

### 1015 **Genetic overlap between cerebellar morphology and brain disorders**

1016 We accessed GWAS summary statistics for attention deficit hyperactivity disorder (ADHD)<sup>94</sup>, autism  
1017 spectrum disorder (ASD)<sup>95</sup>, bipolar disorder (BIP)<sup>96</sup> and major depressive disorder (MDD)<sup>97</sup> from the  
1018 Psychiatric Genomics Consortium. In order to avoid sample overlap, for MDD we used summary  
1019 statistics based on a sample with the UK Biobank participants removed. 23&me participants included  
1020 in the original MDDGWAS were also excluded, since these data are not freely available). Finally,  
1021 we included data from a recent study of schizophrenia (SCZ)<sup>98</sup>. Shared variants associated with  
1022 cerebellar morphology and each of the above-mentioned brain disorders were identified using  
1023 conjunctive FDR statistics ( $FDR < 0.05$ )<sup>99,100</sup>. In contrast to genetic correlation analysis,  
1024 conjunctive FDR does not require effect directions and can therefore be applied to summary  
1025 statistics from multivariate GWAS, which do not contain effect directions. Two genomic regions, the  
1026 extended major histocompatibility complex genes region (hg19 location Chr 6: 25119106–33854733)  
1027 and chromosome 8p23.1 (hg19 location Chr 8: 7242715–12483982) for all cases and *APOE* region  
1028 for ASD, were excluded from the FDR-fitting procedures because complex correlations in regions  
1029 with intricate LD can bias FDR estimation. We further controlled for spurious enrichment by  
1030 calculating all conditional Q-Q plots after random pruning averaged over 500 iterations. At each  
1031 iteration, one SNP in every LD block (defined by an  $r^2 > 0.1$ ) was randomly selected and the empirical  
1032 cumulative distributions were computed using the corresponding p-values. Finally, we submitted  
1033 the results from conjunctive FDR to FUMA v1.3.7<sup>37</sup> to annotate the genomic loci with conjFDR  
1034 value  $< 0.10$  having an  $r^2 \geq 0.6$  with one of the independent significant lead SNPs. Genetic  
1035 correlations between univariate results for the 23 cerebellar features, the 10 comparison brain  
1036 phenotypes, and each of the five mental disorders were computed using LD-score regression as  
1037 described above.

1038

1039 **References for Online Methods:**

1040

- 1041 1. Herculano-Houzel, S. (2016). *The human advantage : a new understanding of how our brain*  
1042 *became remarkable* (The MIT Press).
- 1043 2. Barton, R.A., and Venditti, C. (2014). *Rapid Evolution of the Cerebellum in Humans and Other*  
1044 *Great Apes*. *Curr. Biol.*
- 1045 3. Sereno, M.I., Diedrichsen, J., Tachrount, M., Testa-Silva, G., d'Arceuil, H., and De Zeeuw, C.  
1046 (2020). The human cerebellum has almost 80% of the surface area of the neocortex. *Proc Natl*  
1047 *Acad Sci U S A* *117*, 19538-19543. 10.1073/pnas.2002896117.
- 1048 4. Harrison, P.W., and Montgomery, S.H. (2017). Genetics of Cerebellar and Neocortical  
1049 Expansion in Anthropoid Primates: A Comparative Approach. *Brain Behav Evol* *89*, 274-285.  
1050 10.1159/000477432.
- 1051 5. Leiner, H.C., Leiner, A.L., and Dow, R.S. (1993). Cognitive and language functions of the human  
1052 cerebellum. *Trends in Neurosciences*.
- 1053 6. Strick, P.L., Dum, R.P., and Fiez, J.A. (2009). Cerebellum and Nonmotor Function. *Annu. Rev.*  
1054 *Neurosci.*
- 1055 7. Buckner, R.L. (2013). The cerebellum and cognitive function: 25 years of insight from anatomy  
1056 and neuroimaging. *Neuron*.
- 1057 8. King, M., Hernandez-Castillo, C.R., Poldrack, R.A., Ivry, R.B., and Diedrichsen, J. (2019).  
1058 Functional boundaries in the human cerebellum revealed by a multi-domain task battery. *Nat*  
1059 *Neurosci* *22*, 1371-1378. 10.1038/s41593-019-0436-x.
- 1060 9. Wang, S.S., Kloth, A.D., and Badura, A. (2014). The cerebellum, sensitive periods, and autism.  
1061 *Neuron* *83*, 518-532. 10.1016/j.neuron.2014.07.016.
- 1062 10. Moberget, T., Doan, N.T., Alnaes, D., Kaufmann, T., Cordova-Palomera, A., Lagerberg, T.V.,  
1063 Diedrichsen, J., Schwarz, E., Zink, M., Eisenacher, S., et al. (2018). Cerebellar volume and  
1064 cerebellocerebral structural covariance in schizophrenia: a multisite mega-analysis of 983  
1065 patients and 1349 healthy controls. *Mol Psychiatry* *23*, 1512-1520. 10.1038/mp.2017.106.
- 1066 11. Adams, H.H., Hibar, D.P., Chouraki, V., Stein, J.L., Nyquist, P.A., Renteria, M.E., Trompet, S.,  
1067 Arias-Vasquez, A., Seshadri, S., Desrivieres, S., et al. (2016). Novel genetic loci underlying  
1068 human intracranial volume identified through genome-wide association. *Nat Neurosci* *19*, 1569-  
1069 1582. 10.1038/nn.4398.
- 1070 12. van der Meer, D., Rokicki, J., Kaufmann, T., Cordova-Palomera, A., Moberget, T., Alnaes, D.,  
1071 Bettella, F., Frei, O., Doan, N.T., Sonderby, I.E., et al. (2018). Brain scans from 21,297  
1072 individuals reveal the genetic architecture of hippocampal subfield volumes. *Mol Psychiatry*.  
1073 10.1038/s41380-018-0262-7.
- 1074 13. Chambers, T., Escott-Price, V., Legge, S., Baker, E., Singh, K.D., Walters, J.T.R., Caseras, X.,  
1075 and Anney, R.J.L. (2022). Genetic common variants associated with cerebellar volume and their  
1076 overlap with mental disorders: a study on 33,265 individuals from the UK-Biobank. *Mol*  
1077 *Psychiatry* *27*, 2282-2290. 10.1038/s41380-022-01443-8.
- 1078 14. Tisink, E., de Lange, S.C., Savage, J.E., Wightman, D.P., de Leeuw, C.A., Kelly, K.M., Nagel,  
1079 M., van den Heuvel, M.P., and Posthuma, D. (2022). Genome-wide association study of  
1080 cerebellar volume provides insights into heritable mechanisms underlying brain development  
1081 and mental health. *Commun Biol* *5*, 710. 10.1038/s42003-022-03672-7.
- 1082 15. Macri, S., Savriama, Y., Khan, I., and Di-Poi, N. (2019). Comparative analysis of squamate  
1083 brains unveils multi-level variation in cerebellar architecture associated with locomotor  
1084 specialization. *Nat Commun* *10*, 5560. 10.1038/s41467-019-13405-w.
- 1085 16. Smaers, J.B., Turner, A.H., Gomez-Robles, A., and Sherwood, C.C. (2018). A cerebellar  
1086 substrate for cognition evolved multiple times independently in mammals. *Elife* *7*.  
1087 10.7554/eLife.35696.
- 1088 17. E, K.-H., Chen, S.-H.A., Ho, M.-H.R., and Desmond, J.E. (2014). A meta-analysis of cerebellar  
1089 contributions to higher cognition from PET and fMRI studies. *Hum Brain Mapp*.
- 1090 18. Stoodley, C.J., and Schmahmann, J.D. (2009). Functional topography in the human cerebellum:  
1091 a meta-analysis of neuroimaging studies. *NeuroImage*.

- 1092 19. Buckner, R.L., Krienen, F.M., Castellanos, A., Diaz, J.C., and Yeo, B.T.T. (2011). The  
1093 organization of the human cerebellum estimated by intrinsic functional connectivity. *Journal of*  
1094 *Neurophysiology*.
- 1095 20. Sang, L., Qin, W., Liu, Y., Han, W., Zhang, Y., Jiang, T., and Yu, C. (2012). Resting-state  
1096 functional connectivity of the vermal and hemispheric subregions of the cerebellum with both the  
1097 cerebral cortical networks and subcortical structures. *NeuroImage*. Elsevier Inc.
- 1098 21. Krienen, F.M., and Buckner, R.L. (2009). Segregated fronto-cerebellar circuits revealed by  
1099 intrinsic functional connectivity. *Cerebral Cortex*.
- 1100 22. Bernard, J.A., Seidler, R.D., Hassevoort, K.M., Benson, B.L., Welsh, R.C., Wiggins, J.L., Jaeggi,  
1101 S.M., Buschkuehl, M., Monk, C.S., Jonides, J., and Peltier, S.J. (2012). Resting state cortico-  
1102 cerebellar functional connectivity networks: a comparison of anatomical and self-organizing map  
1103 approaches. *Front Neuroanat*.
- 1104 23. Kipping, J.A., Grodd, W., Kumar, V., Taubert, M., Villringer, A., and Margulies, D.S. (2013).  
1105 Overlapping and parallel cerebello-cerebral networks contributing to sensorimotor control: an  
1106 intrinsic functional connectivity study. *NeuroImage*.
- 1107 24. Wang, C., Kipping, J., Bao, C., Ji, H., and Qiu, A. (2016). Cerebellar Functional Parcellation  
1108 Using Sparse Dictionary Learning Clustering. *Front Neurosci* *10*, 188.  
1109 10.3389/fnins.2016.00188.
- 1110 25. Kipping, J.A., Tuan, T.A., Fortier, M.V., and Qiu, A. (2016). Asynchronous Development of  
1111 Cerebellar, Cerebello-Cortical, and Cortico-Cortical Functional Networks in Infancy, Childhood,  
1112 and Adulthood. *Cereb Cortex*. 10.1093/cercor/bhw298.
- 1113 26. Sotiras, A., Resnick, S.M., and Davatzikos, C. (2015). Finding imaging patterns of structural  
1114 covariance via Non-Negative Matrix Factorization. *Neuroimage* *108*, 1-16.  
1115 10.1016/j.neuroimage.2014.11.045.
- 1116 27. Sotiras, A., Toledo, J.B., Gur, R.E., Gur, R.C., Satterthwaite, T.D., and Davatzikos, C. (2017).  
1117 Patterns of coordinated cortical remodeling during adolescence and their associations with  
1118 functional specialization and evolutionary expansion. *Proc Natl Acad Sci U S A* *114*, 3527-3532.  
1119 10.1073/pnas.1620928114.
- 1120 28. Varikuti, D.P., Genon, S., Sotiras, A., Schwender, H., Hoffstaedter, F., Patil, K.R., Jockwitz, C.,  
1121 Caspers, S., Moebus, S., Amunts, K., et al. (2018). Evaluation of non-negative matrix  
1122 factorization of grey matter in age prediction. *Neuroimage* *173*, 394-410.  
1123 10.1016/j.neuroimage.2018.03.007.
- 1124 29. Nassar, R., Kaczkurkin, A.N., Xia, C.H., Sotiras, A., Pehlivanova, M., Moore, T.M., Garcia de La  
1125 Garza, A., Roalf, D.R., Rosen, A.F.G., Lorch, S.A., et al. (2019). Gestational Age is  
1126 Dimensionally Associated with Structural Brain Network Abnormalities Across Development.  
1127 *Cereb Cortex* *29*, 2102-2114. 10.1093/cercor/bhy091.
- 1128 30. Pehlivanova, M., Wolf, D.H., Sotiras, A., Kaczkurkin, A.N., Moore, T.M., Ciric, R., Cook, P.A.,  
1129 Garcia de La Garza, A., Rosen, A.F.G., Ruparel, K., et al. (2018). Diminished Cortical Thickness  
1130 Is Associated with Impulsive Choice in Adolescence. *J Neurosci* *38*, 2471-2481.  
1131 10.1523/JNEUROSCI.2200-17.2018.
- 1132 31. Rosen, A.F.G., Roalf, D.R., Ruparel, K., Blake, J., Seelaus, K., Villa, L.P., Ciric, R., Cook, P.A.,  
1133 Davatzikos, C., Elliott, M.A., et al. (2018). Quantitative assessment of structural image quality.  
1134 *Neuroimage* *169*, 407-418. 10.1016/j.neuroimage.2017.12.059.
- 1135 32. Bulik-Sullivan, B.K., Loh, P.R., Finucane, H.K., Ripke, S., Yang, J., Schizophrenia Working  
1136 Group of the Psychiatric Genomics, C., Patterson, N., Daly, M.J., Price, A.L., and Neale, B.M.  
1137 (2015). LD Score regression distinguishes confounding from polygenicity in genome-wide  
1138 association studies. *Nat Genet* *47*, 291-295. 10.1038/ng.3211.
- 1139 33. Yang, J., Lee, S.H., Goddard, M.E., and Visscher, P.M. (2011). GCTA: a tool for genome-wide  
1140 complex trait analysis. *Am J Hum Genet* *88*, 76-82. 10.1016/j.ajhg.2010.11.011.
- 1141 34. Markello, R.D., Arnatkeviciute, A., Poline, J.B., Fulcher, B.D., Fornito, A., and Masic, B. (2021).  
1142 Standardizing workflows in imaging transcriptomics with the abagen toolbox. *Elife* *10*.  
1143 10.7554/eLife.72129.

- 1144 35. Hawrylycz, M.J., Lein, E.S., Guillozet-Bongaarts, A.L., Shen, E.H., Ng, L., Miller, J.A., van de  
1145 Lagemaat, L.N., Smith, K.A., Ebbert, A., Riley, Z.L., et al. (2012). An anatomically  
1146 comprehensive atlas of the adult human brain transcriptome. *Nature* 489, 391-399.  
1147 10.1038/nature11405.
- 1148 36. van der Meer, D., Frei, O., Kaufmann, T., Shadrin, A.A., Devor, A., Smeland, O.B., Thompson,  
1149 W.K., Fan, C.C., Holland, D., Westlye, L.T., et al. (2020). Understanding the genetic  
1150 determinants of the brain with MOSTest. *Nat Commun* 11, 3512. 10.1038/s41467-020-17368-1.
- 1151 37. Watanabe, K., Taskesen, E., van Bochoven, A., and Posthuma, D. (2017). Functional mapping  
1152 and annotation of genetic associations with FUMA. *Nat Commun* 8, 1826. 10.1038/s41467-017-  
1153 01261-5.
- 1154 38. Wang, K., Li, M., and Hakonarson, H. (2010). ANNOVAR: functional annotation of genetic  
1155 variants from high-throughput sequencing data. *Nucleic Acids Res* 38, e164.  
1156 10.1093/nar/gkq603.
- 1157 39. Loughnan, R.J., Shadrin, A.A., Frei, O., van der Meer, D., Zhao, W., Palmer, C.E., Thompson,  
1158 W.K., Makowski, C., Jernigan, T.L., Andreassen, O.A., et al. (2022). Generalization of cortical  
1159 MOSTest genome-wide associations within and across samples. *Neuroimage* 263, 119632.  
1160 10.1016/j.neuroimage.2022.119632.
- 1161 40. van der Sluis, S., Posthuma, D., and Dolan, C.V. (2013). TATES: efficient multivariate genotype-  
1162 phenotype analysis for genome-wide association studies. *PLoS Genet* 9, e1003235.  
1163 10.1371/journal.pgen.1003235.
- 1164 41. O'Reilly, P.F., Hoggart, C.J., Pomyen, Y., Calboli, F.C., Elliott, P., Jarvelin, M.R., and Coin, L.J.  
1165 (2012). MultiPhen: joint model of multiple phenotypes can increase discovery in GWAS. *PLoS*  
1166 *One* 7, e34861. 10.1371/journal.pone.0034861.
- 1167 42. Zhao, B., Luo, T., Li, T., Li, Y., Zhang, J., Shan, Y., Wang, X., Yang, L., Zhou, F., Zhu, Z., et al.  
1168 (2019). Genome-wide association analysis of 19,629 individuals identifies variants influencing  
1169 regional brain volumes and refines their genetic co-architecture with cognitive and mental health  
1170 traits. *Nat Genet* 51, 1637-1644. 10.1038/s41588-019-0516-6.
- 1171 43. Smith, S.M., Douaud, G., Chen, W., Hanayik, T., Alfaro-Almagro, F., Sharp, K., and Elliott, L.T.  
1172 (2021). An expanded set of genome-wide association studies of brain imaging phenotypes in UK  
1173 Biobank. *Nat Neurosci* 24, 737-745. 10.1038/s41593-021-00826-4.
- 1174 44. van der Meer, D., Kaufmann, T., Shadrin, A.A., Makowski, C., Frei, O., Roelfs, D., Monereo-  
1175 Sanchez, J., Linden, D.E.J., Rokicki, J., Alnaes, D., et al. (2021). The genetic architecture of  
1176 human cortical folding. *Sci Adv* 7, eabj9446. 10.1126/sciadv.abj9446.
- 1177 45. Bahrami, S., Nordengen, K., Shadrin, A.A., Frei, O., van der Meer, D., Dale, A.M., Westlye, L.T.,  
1178 Andreassen, O.A., and Kaufmann, T. (2022). Distributed genetic architecture across the  
1179 hippocampal formation implies common neuropathology across brain disorders. *Nat Commun*  
1180 13, 3436. 10.1038/s41467-022-31086-w.
- 1181 46. Albers, P.K., and McVean, G. (2020). Dating genomic variants and shared ancestry in  
1182 population-scale sequencing data. *PLoS Biol* 18, e3000586. 10.1371/journal.pbio.3000586.
- 1183 47. Libedinsky, I., Wei, Y., Leeuw, C.d., Rilling, J., Posthuma, D., and Heuvel, M.P.v.d. (2023).  
1184 Genetic timeline of human brain and cognitive traits. *bioRxiv*, 2023.2002.2005.525539.  
1185 10.1101/2023.02.05.525539.
- 1186 48. Davies, S. (2021). Behavioral Modernity in Retrospect. *Topoi* 40, 221-232. 10.1007/s11245-019-  
1187 09671-4.
- 1188 49. de Leeuw, C.A., Mooij, J.M., Heskes, T., and Posthuma, D. (2015). MAGMA: generalized gene-  
1189 set analysis of GWAS data. *PLoS Comput Biol* 11, e1004219. 10.1371/journal.pcbi.1004219.
- 1190 50. Wei, Y., de Lange, S.C., Scholtens, L.H., Watanabe, K., Ardesch, D.J., Jansen, P.R., Savage,  
1191 J.E., Li, L., Preuss, T.M., Rilling, J.K., et al. (2019). Genetic mapping and evolutionary analysis  
1192 of human-expanded cognitive networks. *Nat Commun* 10, 4839. 10.1038/s41467-019-12764-8.
- 1193 51. Won, H., Huang, J., Opland, C.K., Hartl, C.L., and Geschwind, D.H. (2019). Human evolved  
1194 regulatory elements modulate genes involved in cortical expansion and neurodevelopmental  
1195 disease susceptibility. *Nat Commun* 10, 2396. 10.1038/s41467-019-10248-3.

- 1196 52. Liberzon, A., Birger, C., Thorvaldsdottir, H., Ghandi, M., Mesirov, J.P., and Tamayo, P. (2015).  
1197 The Molecular Signatures Database (MSigDB) hallmark gene set collection. *Cell Syst* 1, 417-  
1198 425. 10.1016/j.cels.2015.12.004.
- 1199 53. Subramanian, A., Tamayo, P., Mootha, V.K., Mukherjee, S., Ebert, B.L., Gillette, M.A.,  
1200 Paulovich, A., Pomeroy, S.L., Golub, T.R., Lander, E.S., and Mesirov, J.P. (2005). Gene set  
1201 enrichment analysis: a knowledge-based approach for interpreting genome-wide expression  
1202 profiles. *Proc Natl Acad Sci U S A* 102, 15545-15550. 10.1073/pnas.0506580102.
- 1203 54. Kircher, M., Witten, D.M., Jain, P., O'Roak, B.J., Cooper, G.M., and Shendure, J. (2014). A  
1204 general framework for estimating the relative pathogenicity of human genetic variants. *Nat Genet*  
1205 46, 310-315. 10.1038/ng.2892.
- 1206 55. Andreassen, O.A., Thompson, W.K., Schork, A.J., Ripke, S., Mattingsdal, M., Kelsoe, J.R.,  
1207 Kendler, K.S., O'Donovan, M.C., Rujescu, D., Werge, T., et al. (2013). Improved detection of  
1208 common variants associated with schizophrenia and bipolar disorder using pleiotropy-informed  
1209 conditional false discovery rate. *PLoS Genet* 9, e1003455. 10.1371/journal.pgen.1003455.
- 1210 56. King, M.Z., Zonglei, Ivry, Richard B.; Weiner, Kevin S. Transcriptomic Gradients Of The Human  
1211 Cerebellum.
- 1212 57. Guell, X., Gabrieli, J.D.E., and Schmahmann, J.D. (2018). Triple representation of language,  
1213 working memory, social and emotion processing in the cerebellum: convergent evidence from  
1214 task and seed-based resting-state fMRI analyses in a single large cohort. *Neuroimage* 172, 437-  
1215 449. 10.1016/j.neuroimage.2018.01.082.
- 1216 58. Chen, C.H., Gutierrez, E.D., Thompson, W., Panizzon, M.S., Jernigan, T.L., Eyler, L.T.,  
1217 Fennema-Notestine, C., Jak, A.J., Neale, M.C., Franz, C.E., et al. (2012). Hierarchical genetic  
1218 organization of human cortical surface area. *Science* 335, 1634-1636.  
1219 10.1126/science.1215330.
- 1220 59. Chen, C.H., Fiecas, M., Gutierrez, E.D., Panizzon, M.S., Eyler, L.T., Vuoksimaa, E., Thompson,  
1221 W.K., Fennema-Notestine, C., Hagler, D.J., Jr., Jernigan, T.L., et al. (2013). Genetic topography  
1222 of brain morphology. *Proc Natl Acad Sci U S A* 110, 17089-17094. 10.1073/pnas.1308091110.
- 1223 60. Guissart, C., Latypova, X., Rollier, P., Khan, T.N., Stamberger, H., McWalter, K., Cho, M.T.,  
1224 Kjaergaard, S., Weckhuysen, S., Lesca, G., et al. (2018). Dual Molecular Effects of Dominant  
1225 RORA Mutations Cause Two Variants of Syndromic Intellectual Disability with Either Autism or  
1226 Cerebellar Ataxia. *Am J Hum Genet* 102, 744-759. 10.1016/j.ajhg.2018.02.021.
- 1227 61. Chi, C.L., Martinez, S., Wurst, W., and Martin, G.R. (2003). The isthmic organizer signal FGF8  
1228 is required for cell survival in the prospective midbrain and cerebellum. *Development* 130, 2633-  
1229 2644. 10.1242/dev.00487.
- 1230 62. Li, S., Qiu, F., Xu, A., Price, S.M., and Xiang, M. (2004). Barhl1 regulates migration and survival  
1231 of cerebellar granule cells by controlling expression of the neurotrophin-3 gene. *J Neurosci* 24,  
1232 3104-3114. 10.1523/JNEUROSCI.4444-03.2004.
- 1233 63. de Sousa, A.A., Beaudet, A., Calvey, T., Bardo, A., Benoit, J., Charvet, C.J., Dehay, C., Gomez-  
1234 Robles, A., Gunz, P., Heuer, K., et al. (2023). From fossils to mind. *Commun Biol* 6, 636.  
1235 10.1038/s42003-023-04803-4.
- 1236 64. Neubauer, S., Hublin, J.J., and Gunz, P. (2018). The evolution of modern human brain shape.  
1237 *Sci Adv* 4, eaao5961. 10.1126/sciadv.aao5961.
- 1238 65. Valence, S., Garel, C., Barth, M., Toutain, A., Paris, C., Amsallem, D., Barthez, M.A., Mayer, M.,  
1239 Rodriguez, D., and Burglen, L. (2016). RELN and VLDLR mutations underlie two distinguishable  
1240 clinico-radiological phenotypes. *Clin Genet* 90, 545-549. 10.1111/cge.12779.
- 1241 66. Larouche, M., Beffert, U., Herz, J., and Hawkes, R. (2008). The Reelin receptors Apoer2 and  
1242 Vldlr coordinate the patterning of Purkinje cell topography in the developing mouse cerebellum.  
1243 *PLoS One* 3, e1653. 10.1371/journal.pone.0001653.
- 1244 67. Wolfers, T., Doan, N.T., Kaufmann, T., Alnaes, D., Moberget, T., Agartz, I., Buitelaar, J.K.,  
1245 Ueland, T., Melle, I., Franke, B., et al. (2018). Mapping the Heterogeneous Phenotype of  
1246 Schizophrenia and Bipolar Disorder Using Normative Models. *JAMA Psychiatry* 75, 1146-1155.  
1247 10.1001/jamapsychiatry.2018.2467.

- 1248 68. Wolfers, T., Rokicki, J., Alnaes, D., Berthet, P., Agartz, I., Kia, S.M., Kaufmann, T., Zabihi, M.,  
1249 Moberget, T., Melle, I., et al. (2021). Replicating extensive brain structural heterogeneity in  
1250 individuals with schizophrenia and bipolar disorder. *Hum Brain Mapp* 42, 2546-2555.  
1251 10.1002/hbm.25386.
- 1252 69. Armstrong, N.C., Anderson, R.C., and McDermott, K.W. (2019). Reelin: Diverse roles in central  
1253 nervous system development, health and disease. *Int J Biochem Cell Biol* 112, 72-75.  
1254 10.1016/j.biocel.2019.04.009.
- 1255 70. Li, M., Huang, L., Grigoriou-Serbanescu, M., Bergen, S.E., Landen, M., Hultman, C.M., Forstner,  
1256 A.J., Strohmaier, J., Hecker, J., Schulze, T.G., et al. (2016). Convergent Lines of Evidence  
1257 Support LRP8 as a Susceptibility Gene for Psychosis. *Mol Neurobiol* 53, 6608-6619.  
1258 10.1007/s12035-015-9559-6.
- 1259 71. Okbay, A., Wu, Y., Wang, N., Jayashankar, H., Bennett, M., Nehzati, S.M., Sidorenko, J., Kweon,  
1260 H., Goldman, G., Gjorgjieva, T., et al. (2022). Polygenic prediction of educational attainment  
1261 within and between families from genome-wide association analyses in 3 million individuals. *Nat*  
1262 *Genet* 54, 437-449. 10.1038/s41588-022-01016-z.
- 1263 72. Wang, Q., Dhindsa, R.S., Carss, K., Harper, A.R., Nag, A., Tachmazidou, I., Vitsios, D., Deevi,  
1264 S.V.V., Mackay, A., Muthas, D., et al. (2021). Rare variant contribution to human disease in  
1265 281,104 UK Biobank exomes. *Nature* 597, 527-532. 10.1038/s41586-021-03855-y.
- 1266 73. Fischl, B., Salat, D.H., Busa, E., Albert, M., Dieterich, M., Haselgrove, C., van der Kouwe, A.,  
1267 Killiany, R., Kennedy, D., Klaveness, S., et al. (2002). Whole brain segmentation: automated  
1268 labeling of neuroanatomical structures in the human brain. *Neuron* 33, 341-355. 10.1016/s0896-  
1269 6273(02)00569-x.
- 1270 74. Diedrichsen, J. (2006). A spatially unbiased atlas template of the human cerebellum.  
1271 *NeuroImage*.
- 1272 75. Leys, C., Ley, C., Klein, O., Bernard, P., and Licata, L. (2013). Detecting outliers: Do not use  
1273 standard deviation around the mean, use absolute deviation around the median. *Journal of*  
1274 *Experimental Social Psychology* 49, 764-766. <https://doi.org/10.1016/j.jesp.2013.03.013>.
- 1275 76. de Jong, L.W., Vidal, J.S., Forsberg, L.E., Zijdenbos, A.P., Haight, T., Alzheimer's Disease  
1276 Neuroimaging, I., Sigurdsson, S., Gudnason, V., van Buchem, M.A., and Launer, L.J. (2017).  
1277 Allometric scaling of brain regions to intra-cranial volume: An epidemiological MRI study. *Hum*  
1278 *Brain Mapp* 38, 151-164. 10.1002/hbm.23351.
- 1279 77. Mankiw, C., Park, M.T.M., Reardon, P.K., Fish, A.M., Clasen, L.S., Greenstein, D., Giedd, J.N.,  
1280 Blumenthal, J.D., Lerch, J.P., Chakravarty, M.M., and Raznahan, A. (2017). Allometric Analysis  
1281 Detects Brain Size-Independent Effects of Sex and Sex Chromosome Complement on Human  
1282 Cerebellar Organization. *J Neurosci* 37, 5221-5231. 10.1523/JNEUROSCI.2158-16.2017.
- 1283 78. Friston, K.J. (2007). *Statistical parametric mapping : the analysis of funtional brain images*, 1st  
1284 Edition (Elsevier/Academic Press).
- 1285 79. Kuhn, H.W. (1955). The Hungarian method for the assignment problem. *Naval Research*  
1286 *Logistics Quarterly* 2, 14.
- 1287 80. Santos, J.M., and Embrechts, M. (2009). On the Use of the Adjusted Rand Index as a Metric for  
1288 Evaluating Supervised Classification. held in Berlin, Heidelberg, (Springer Berlin Heidelberg),  
1289 pp. 175-184.
- 1290 81. Beasley, T.M., Erickson, S., and Allison, D.B. (2009). Rank-based inverse normal  
1291 transformations are increasingly used, but are they merited? *Behav Genet* 39, 580-595.  
1292 10.1007/s10519-009-9281-0.
- 1293 82. Bycroft, C., Freeman, C., Petkova, D., Band, G., Elliott, L.T., Sharp, K., Motyer, A., Vukcevic, D.,  
1294 Delaneau, O., O'Connell, J., et al. (2018). The UK Biobank resource with deep phenotyping and  
1295 genomic data. *Nature* 562, 203-209. 10.1038/s41586-018-0579-z.
- 1296 83. Boyle, A.P., Hong, E.L., Hariharan, M., Cheng, Y., Schaub, M.A., Kasowski, M., Karczewski,  
1297 K.J., Park, J., Hitz, B.C., Weng, S., et al. (2012). Annotation of functional variation in personal  
1298 genomes using RegulomeDB. *Genome Res* 22, 1790-1797. 10.1101/gr.137323.112.
- 1299 84. Zhu, Z., Zhang, F., Hu, H., Bakshi, A., Robinson, M.R., Powell, J.E., Montgomery, G.W.,  
1300 Goddard, M.E., Wray, N.R., Visscher, P.M., and Yang, J. (2016). Integration of summary data

- 1301 from GWAS and eQTL studies predicts complex trait gene targets. *Nat Genet* 48, 481-487.  
1302 10.1038/ng.3538.
- 1303 85. Arnatkeviciute, A., Fulcher, B.D., and Fornito, A. (2019). A practical guide to linking brain-wide  
1304 gene expression and neuroimaging data. *Neuroimage* 189, 353-367.  
1305 10.1016/j.neuroimage.2019.01.011.
- 1306 86. Quackenbush, J. (2002). Microarray data normalization and transformation. *Nat Genet* 32 *Suppl*,  
1307 496-501. 10.1038/ng1032.
- 1308 87. Hawrylycz, M., Miller, J.A., Menon, V., Feng, D., Dolbeare, T., Guillozet-Bongaarts, A.L., Jegga,  
1309 A.G., Aronow, B.J., Lee, C.K., Bernard, A., et al. (2015). Canonical genetic signatures of the  
1310 adult human brain. *Nat Neurosci* 18, 1832-1844. 10.1038/nn.4171.
- 1311 88. Fulcher, B.D., Little, M.A., and Jones, N.S. (2013). Highly comparative time-series analysis: the  
1312 empirical structure of time series and their methods. *J R Soc Interface* 10, 20130048.  
1313 10.1098/rsif.2013.0048.
- 1314 89. Genomes Project, C., Auton, A., Brooks, L.D., Durbin, R.M., Garrison, E.P., Kang, H.M., Korbel,  
1315 J.O., Marchini, J.L., McCarthy, S., McVean, G.A., and Abecasis, G.R. (2015). A global reference  
1316 for human genetic variation. *Nature* 526, 68-74. 10.1038/nature15393.
- 1317 90. Mallick, S., Li, H., Lipson, M., Mathieson, I., Gymrek, M., Racimo, F., Zhao, M., Chennagiri, N.,  
1318 Nordenfelt, S., Tandon, A., et al. (2016). The Simons Genome Diversity Project: 300 genomes  
1319 from 142 diverse populations. *Nature* 538, 201-206. 10.1038/nature18964.
- 1320 91. Federico, A., and Monti, S. (2020). hypeR: an R package for geneset enrichment workflows.  
1321 *Bioinformatics* 36, 1307-1308. 10.1093/bioinformatics/btz700.
- 1322 92. Rouillard, A.D., Gundersen, G.W., Fernandez, N.F., Wang, Z., Monteiro, C.D., McDermott, M.G.,  
1323 and Ma'ayan, A. (2016). The harmonizome: a collection of processed datasets gathered to serve  
1324 and mine knowledge about genes and proteins. *Database (Oxford)* 2016.  
1325 10.1093/database/baw100.
- 1326 93. Doan, R.N., Bae, B.I., Cubelos, B., Chang, C., Hossain, A.A., Al-Saad, S., Mukaddes, N.M.,  
1327 Oner, O., Al-Saffar, M., Balkhy, S., et al. (2016). Mutations in Human Accelerated Regions  
1328 Disrupt Cognition and Social Behavior. *Cell* 167, 341-354 e312. 10.1016/j.cell.2016.08.071.
- 1329 94. Demontis, D., Walters, R.K., Martin, J., Mattheisen, M., Als, T.D., Agerbo, E., Baldursson, G.,  
1330 Belliveau, R., Bybjerg-Grauholm, J., Baekvad-Hansen, M., et al. (2019). Discovery of the first  
1331 genome-wide significant risk loci for attention deficit/hyperactivity disorder. *Nat Genet* 51, 63-75.  
1332 10.1038/s41588-018-0269-7.
- 1333 95. Grove, J., Ripke, S., Als, T.D., Mattheisen, M., Walters, R.K., Won, H., Pallesen, J., Agerbo, E.,  
1334 Andreassen, O.A., Anney, R., et al. (2019). Identification of common genetic risk variants for  
1335 autism spectrum disorder. *Nat Genet* 51, 431-444. 10.1038/s41588-019-0344-8.
- 1336 96. Mullins, N., Forstner, A.J., O'Connell, K.S., Coombes, B., Coleman, J.R.I., Qiao, Z., Als, T.D.,  
1337 Bigdeli, T.B., Borte, S., Bryois, J., et al. (2021). Genome-wide association study of more than  
1338 40,000 bipolar disorder cases provides new insights into the underlying biology. *Nat Genet* 53,  
1339 817-829. 10.1038/s41588-021-00857-4.
- 1340 97. Wray, N.R., Ripke, S., Mattheisen, M., Trzaskowski, M., Byrne, E.M., Abdellaoui, A., Adams,  
1341 M.J., Agerbo, E., Air, T.M., Andlauer, T.M.F., et al. (2018). Genome-wide association analyses  
1342 identify 44 risk variants and refine the genetic architecture of major depression. *Nat Genet* 50,  
1343 668-681. 10.1038/s41588-018-0090-3.
- 1344 98. Pardinias, A.F., Holmans, P., Pocklington, A.J., Escott-Price, V., Ripke, S., Carrera, N., Legge,  
1345 S.E., Bishop, S., Cameron, D., Hamshere, M.L., et al. (2018). Common schizophrenia alleles  
1346 are enriched in mutation-intolerant genes and in regions under strong background selection. *Nat*  
1347 *Genet* 50, 381-389. 10.1038/s41588-018-0059-2.
- 1348 99. Andreassen, O.A., Djurovic, S., Thompson, W.K., Schork, A.J., Kendler, K.S., O'Donovan, M.C.,  
1349 Rujescu, D., Werge, T., van de Bunt, M., Morris, A.P., et al. (2013). Improved detection of  
1350 common variants associated with schizophrenia by leveraging pleiotropy with cardiovascular-  
1351 disease risk factors. *Am J Hum Genet* 92, 197-209. 10.1016/j.ajhg.2013.01.001.
- 1352 100. Smeland, O.B., Frei, O., Shadrin, A., O'Connell, K., Fan, C.C., Bahrami, S., Holland, D., Djurovic,  
1353 S., Thompson, W.K., Dale, A.M., and Andreassen, O.A. (2020). Discovery of shared genomic

1354 loci using the conditional false discovery rate approach. *Hum Genet* 139, 85-94.  
1355 10.1007/s00439-019-02060-2.  
1356

1357  
1358  
1359 **Acknowledgements**  
1360

1361 This work was performed on the Tjeneste for Sensitive Data (TSD) facilities, owned by the University of  
1362 Oslo, operated and developed by the TSD service group at the University of Oslo, IT-Department (USIT)  
1363 and on resources provided by UNINETT Sigma2—the National Infrastructure for High Performance  
1364 Computing and Data Storage in Norway. The research has been conducted using the UK Biobank  
1365 Resource (access code 27412) and using summary statistics for various brain disorders. We would like  
1366 to thank the research participants and employees of UK Biobank and the consortia contributing  
1367 summary statistics for making this work possible.  
1368

1369 **Funding:** The authors were funded by the South-Eastern Norway Regional Health Authority (TM: 2021-  
1370 040; OAA: 2013-123, 2017-112, 2019-108. LTW: 2014-097, 2015-073, 2016-083), the Research  
1371 Council of Norway (TK: 276082, 323961. OAA: 213837, 223273, 248778, 273291, 262656, 229129,  
1372 283798, 311993. LTW: 204966, 249795, 273345), Norwegian Health Association (SB: 22731), Stiftelsen  
1373 Kristian Gerhard Jebsen, and the European Research Council (LTW: ERCStG 802998). The funding  
1374 bodies had no role in the analysis or interpretation of the data; the preparation, review or approval of  
1375 the manuscript; nor in the decision to submit the manuscript for publication.  
1376

1377 **Author contributions:** TM originally conceived of the project. TM, DvdM and SB performed the  
1378 analyses. TM, LTW and OAA wrote the initial draft of the manuscript. All authors discussed the results  
1379 and contributed to the final manuscript.  
1380

1381 **Competing interests:** O.A.A. has received speaker's honorarium from Lundbeck and is a consultant to  
1382 HealthLytix. A.M.D. is the founder of and holds equity in CorTechs Labs Inc. and serves on its Scientific  
1383 Advisory Board. A.M.D. is also a member of the Scientific Advisory Board of Human Longevity Inc. and  
1384 receives funding through research agreements with General Electric Healthcare and Medtronic Inc. The  
1385 terms of these arrangements have been reviewed and approved by UCSD in accordance with its  
1386 conflict-of-interest policies. A.M.D. is an inventor on a patent related to this work, filed by CorTechs Labs  
1387 Inc. (9 US-7324842B2, filed 22 January 2002, published 29-01-2008). The other authors declare that  
1388 they have no competing interests.  
1389



1390 **Data availability**

1391 In this study we used brain imaging and genetics data from the UK Biobank  
1392 [<https://www.ukbiobank.ac.uk/>], and GWAS summary statistics obtained from the Psychiatric Genomics  
1393 Consortium [<https://www.med.unc.edu/pgc/shared-methods/>] and GWAS catalog  
1394 [<https://www.ebi.ac.uk/gwas/>]. The summary statistics for cerebellar morphology derived in this study  
1395 are available both in the GWAS Catalog [<https://www.ebi.ac.uk/gwas/>] and in our github repository  
1396 [<https://github.com/norment/open-science>] (will make this public upon acceptance). FUMA results are  
1397 available online (will make this public upon acceptance). The Human Genome Dating Dataset (HGD) is  
1398 available at <https://human.genome.dating>.

1399

1400 **Code availability**

1401 All code and software needed to generate the results is available as part of public resources, specifically  
1402 FreeSurfer (<https://surfer.nmr.mgh.harvard.edu>), SUIT (<https://github.com/jdiedrichsen/suit>), OPNMF  
1403 (<https://github.com/asotiras/brainparts>), MOSTest (<https://github.com/precimed/mostest>), FUMA  
1404 (<https://fuma.ctglab.nl/>), MAGMA (<https://ctg.cncr.nl/software/magma>), abagen  
1405 (<https://github.com/rmarkello/abagen>), conjuncional FDR (<https://github.com/precimed/pleiofdr/>) and  
1406 LD score regression (<https://github.com/bulik/ldsc>).

1407

1408 **Supplementary Materials:**

- 1409 1. Supplementary Figures 1-15.  
1410 2. Supplementary Information – Data Tables 1-37.
